1 **Title: Minimizing the ex vivo confounds of cell-isolation techniques on transcriptomic -**  
2 **profiles of purified microglia**

3 **Running Title:** Microglial activation during cell isolation

4 **Authors:** Sarah R. Ocañas<sup>1,2</sup>, Kevin D. Pham<sup>1</sup>, Harris E. Blankenship<sup>1,2</sup>, Adeline H.  
5 Machalinski<sup>1</sup>, Ana J. Chucair-Elliott<sup>1</sup>, Willard M. Freeman<sup>1,3,4\*</sup>

6 **Affiliations:** <sup>1</sup>Genes & Human Disease Program, Oklahoma Medical Research Foundation,  
7 Oklahoma City, OK USA, <sup>2</sup>Department of Physiology, University of Oklahoma Health Sciences  
8 Center, Oklahoma City, OK USA, <sup>3</sup>Oklahoma City Veterans Affairs Medical Center, Oklahoma  
9 City, OK USA, <sup>4</sup>Department of Biochemistry and Molecular Biology, University of Oklahoma  
10 Health Sciences Center, Oklahoma City, OK USA

11 **To whom correspondence should be addressed:** \*Willard M. Freeman, Genes & Human  
12 Disease Program, Oklahoma Medical Research Foundation, 825 NE 13<sup>th</sup> Street, Oklahoma  
13 City, OK 73104, USA.

14 **Tel:** 405-271-3139

15 **Fax:** 405-271-2536

16 **E-mail address:** [bill-freeman@omrf.org](mailto:bill-freeman@omrf.org)

17

18

19

20 **Acknowledgments:** This work was supported by grants from the National Institutes of Health  
21 (NIH) P30AG050911, R01AG059430, R56AG067754, T32AG052363, F31AG064861,  
22 P30EY021725, Oklahoma Center for Adult Stem Cell Research (OCASCR), a program of the  
23 Oklahoma Tobacco Settlement Endowment Trust, BrightFocus Foundation (M2020207), and  
24 Presbyterian Health Foundation. This work was also supported in part by the MERIT award  
25 I01BX003906 and a Shared Equipment Evaluation Program (ShEEP) award ISIBX004797 from  
26 the United States (U.S.) Department of Veterans Affairs, Biomedical Laboratory Research and  
27 Development Service. The authors would also like to thank the Clinical Genomics Center (OMRF),  
28 Imaging Core Facility (OMRF) and DMEI (OUHSC), and Flow Cytometry and Cell Sorting Core  
29 Facility (OMRF) for assistance and instrument usage and Jan Brandel for assistance with  
30 illustrations. Some reagents and loan of a cytometer instrument were supplied at no cost by  
31 Miltyeni Biotec.

32 **Word Count:** 11,393

33 **Abstract**

34 Modern molecular neuroscience studies require analysis of specific cellular populations derived  
35 from brain tissue samples to disambiguate cell-type specific events. This is particularly true in the  
36 analysis of minority glial populations in the brain, such as microglia, which may be obscured in  
37 whole tissue analyses. Microglia have central functions in development, aging, and  
38 neurodegeneration and are a current focus of neuroscience research. A long-standing concern  
39 for glial biologists using *in vivo* models is whether cell isolation from CNS tissue could introduce  
40 *ex vivo* artifacts in microglia, which respond quickly to changes in the environment. Mouse  
41 microglia were purified by magnetic-activated cell sorting (MACS), as well as cytometer- and  
42 cartridge-based fluorescence-activated cell sorting (FACS) approaches to compare and contrast  
43 performance. The Cx3cr1-NuTRAP mouse model was used here to provide an endogenous  
44 fluorescent microglial marker and a microglial-specific transcriptome profile as a baseline  
45 comparison lacking cell isolation artifacts. All methods performed similarly for microglial purity  
46 with main differences being in cell yield and time of isolation. *Ex vivo* activation signatures  
47 occurred principally during the initial tissue dissociation and cell preparation and not the microglial  
48 cell sorting. Utilizing transcriptional and translational inhibitors during the cell preparation  
49 prevented the activational phenotype. These data demonstrate that a variety of microglial isolation  
50 approaches can be used, depending on experimental needs, and that inhibitor cocktails are  
51 effective at reducing cell preparation artifacts.

52

53

54 **Keywords:**

55 Microglia, cell sorting, brain, transcriptome, methods

56 **Table of Contents Image:**

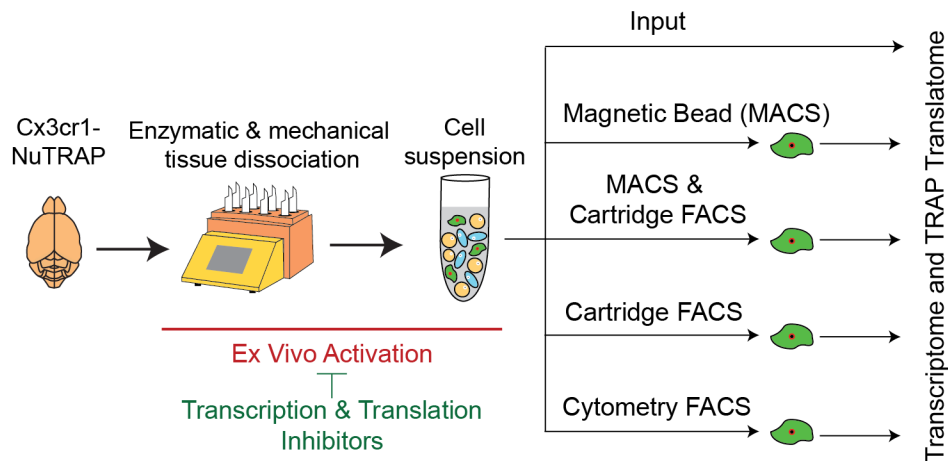

58 **Main Points**

59 MACS, cytometer-FACS, and cartridge-FACS give equivalent and sufficient yield/purity for  
60 microglial analyses. *Ex vivo* microglial activation is prevented by supplementation with  
61 transcription/translation inhibitors during cell preparation.

62 **Introduction**

63 Microglia, the brain's resident macrophages, have come to the forefront of neuroimmunology  
64 research (Prinz, Jung, & Priller, 2019). They serve as surveyors of the central nervous system  
65 and exhibit behavior derived from their embryonic precursors, myeloid cells (Cuadros &  
66 Navascues, 1998; Rock et al., 2004), with roles in neurodevelopment, sex differences, as well as  
67 in health and neurodegenerative diseases (Butovsky & Weiner, 2018; Han, Fan, Zhou, Blomgren,  
68 & Harris, 2021; Salter & Stevens, 2017). Microglial activity is governed by local  
69 microenvironments and through communication with neighboring cells. Under stress, microglial  
70 cells transition to an activated phenotype, classically defined by morphological transformation  
71 from ramified to amoeboid, release of pro-inflammatory cytokines, and a shift in global gene  
72 expression (Avignone, Lepleux, Angibaud, & Nagerl, 2015; Rock et al., 2004; Sierra, Abiega,  
73 Shahraz, & Neumann, 2013). With the advent of single cell transcriptomic sequencing, the field  
74 has undergone a taxonomy reclassification (Dubbelaar, Kracht, Eggen, & Boddeke, 2018;  
75 Provenzano, Perez, & Deleidi, 2021). Current evidence suggests microglia exist within a  
76 phenotypic gradient, and the transition away from a quiescent state is no longer viewed as binary  
77 'on' or 'off'. Thus, the use of microglial gene expression profiles to infer functional status has  
78 bolstered the use of transcriptomic profiling as a powerful technique for microglial classification.

79 Traditionally, transcriptomic analyses from specific cell types required the liberation of cells from  
80 their native environment and use of fluorescence-activated cell sorting (FACS) or MACS labeling  
81 techniques prior to RNA extraction (Cahoy et al., 2008). Cell dissociation primarily consists of  
82 enzymatic and mechanical dissociation with quality checks for cell viability, debris removal, and  
83 absence of cell aggregation (Reichard & Asosingh, 2019). Creation of a single-cell suspension  
84 from brain tissue and isolation of microglia is harsh and may alter the phenotypic state of microglia  
85 *ex vivo* (Haimon et al., 2018; Wu, Pan, Zuo, Li, & Hong, 2017). *Ex vivo* microglial activation has  
86 the potential of introducing confounds that may mask endogenously induced activation, such as  
87 in a pathological state. To avoid cell-isolation confounds, microglial-specific cre-lines (Cx3cr1-  
88 Cre) have been combined with various floxed ribosomal tagging models: 1) ribosome tagging  
89 (RiboTag) (Haimon et al., 2018), 2) translating ribosome affinity purification (TRAP) (Ayata et al.,  
90 2018), and 3) nuclear tagging and translating ribosome affinity purification (NuTRAP) (Chucair-  
91 Elliott et al., 2020), allowing the immunoprecipitation (IP) of tagged polysomes to isolate  
92 microglial-specific translomes without the need for cell isolation. Although transgenic ribosome  
93 IP-approaches overcome many of the potential confounds of *ex vivo* activation, experimental  
94 endpoints such as proteomics and single cell heterogeneity still require cell isolation of intact  
95 microglial cells. Additionally, animal availability, complex breeding strategies, and cost will  
96 continue to be a deterrent for many investigators to using transgenic microglial labeling. While  
97 single-cell sequencing allows for broad and potentially unbiased analysis of various cell types, it  
98 too is predicated on the creation of a single-cell suspension. Thus, an understanding of the effects  
99 of cell preparation and isolation methods on *ex vivo* activation while maintaining highly pure  
100 microglial enrichment is needed. The advent of ribosome tagging approaches allows generation  
101 of a reference microglial signature to which sorted microglial profiles can be compared. Thus, the  
102 goals of this study were to compare purity and yield of isolated microglia and assess the relative  
103 level of *ex vivo* activation by comparing Cx3cr1-TRAP-isolated RNA to various sorting techniques  
104 used for microglia: MACS (Holt & Olsen, 2016; Nikodemova & Watters, 2012), cytometer-based  
105 FACS (Hickman et al., 2013), and newly available low-pressure cartridge-based FACS (Roberts,  
106 Anderson, Carmody, & Bosio, 2021)) using TRAP-enrichment as a baseline purified microglial  
107 translome for *ex vivo* activation.

108 The previously described Cx3cr1-NuTRAP line (Chucair-Elliott et al., 2020) was used in all  
109 comparisons of isolation efficacy of various cell sorting techniques including high- and low-  
110 pressure fluorescence-activated cell sorting (FACS) as well as magnetic-activated cell sorting  
111 (MACS) isolation. We compared artifacts induced through three cell sorting techniques via  
112 transcriptomic profiling of bulk tissue, sorted cells, and immunoprecipitated translomes and

113 found similar performance with *ex vivo* activational signatures principally occurring during the  
114 enzymatic digestion and mechanical dissociation during initial cell preparation. Inclusion of  
115 transcriptional and translational inhibitors during the cell preparation step prevented most of these  
116 artifacts. These studies provide critical insight into the sensitivity of microglia and guidance on  
117 experimental design to minimize *ex vivo* confounds of microglial isolation.

118

## 119 **Materials and Methods**

### 120 **Animals**

121 All animal procedures were approved by the Institutional Animal Care and Use Committee at the  
122 Oklahoma Medical Research Foundation (OMRF). Parent mice were purchased from the Jackson  
123 Laboratory (Bar Harbor, ME) and bred and housed in the animal facility at the OMRF, under SPF  
124 conditions in a HEPA barrier environment. Cx3cr1-Cre/ERT2<sup>+/+</sup> males (stock # 20940) (Yona et  
125 al., 2013) were mated with NuTRAP<sup>flox/flox</sup> females (stock # 029899) (Chucair-Elliott et al., 2020;  
126 Roh et al., 2018) to generate the desired progeny, Cx3cr1-cre/ERT2<sup>+/wt</sup>; NuTRAP<sup>flox/wt</sup> (Cx3cr1-  
127 NuTRAP) (Chucair-Elliott et al., 2020). DNA was extracted from mouse ear punch samples for  
128 genotyping. Mice (males and females) were ~3-8 months old at the time of performing  
129 experiments. Euthanasia prior to tissue harvesting was carried out by cervical dislocation followed  
130 by rapid decapitation. The primers used for genotyping (Integrated DNA Technologies, Coralville,  
131 IA) are included in **Table S1**.

### 132 **Tamoxifen (Tam) induction of cre recombinase**

133 At ~3 months of age, mice received a daily intraperitoneal (ip) injection of tamoxifen (Tam)  
134 solubilized in 100% sunflower seed oil by sonication (100 mg/kg body weight, 20 mg/mL stock  
135 solution, #T5648; Millipore Sigma, St. Louis, MO) for five consecutive days (Chucair-Elliott et al.,  
136 2020; Chucair-Elliott et al., 2019; Srinivasan et al., 2016).

### 137 **Preparation of single cell suspension from mouse brain**

138 Halves of Cx3cr1-NuTRAP mouse brains were rinsed in D-PBS, sliced into 4 sagittal sections and  
139 placed into gentleMACS C-tubes (#130-093-237, Miltenyi Biotec, San Diego, CA), and processed  
140 for generation of single-cell suspensions using the Adult Brain Dissociation Kit and GentleMACS  
141 Octo Dissociator system (#130-107-677 and #130-095-937, respectively, Miltenyi Biotec)  
142 (Chucair-Elliott et al., 2020). Following debris removal (#130-109-398, Miltenyi Biotec), cells were  
143 resuspended in 1 mL 0.5% BSA in D-PBS (#130-091-376, Miltenyi Biotec) and filtered through a

144 35 µm filter (#352235, Fisher Scientific). An aliquot of cells was retained as “Cell Input” for flow  
145 cytometric and RNA-Seq analyses.

#### 146 **Cell Counting**

147 Filtered cells were diluted 10x in 0.5%BSA in D-PBS (#130-091-376, Miltenyi Biotec) prior to cell  
148 counting on a MACSQuant Analyzer 10 (#130-096-343, Miltenyi Biotec). 50 µL diluted cells were  
149 analyzed to determine absolute cell count. Cells were gated on FSC-A/SSC-A to determine cell  
150 count and FSC-A/FSC-H to determine singlet count. Absolute cell counts were used to determine  
151 antibody staining ratios.

#### 152 **Cd11b Magnetic Labeling and Separation**

153 Cells were pelleted at 300 x g for 10 minutes at 4°C and resuspended in 90 µL of 0.5% BSA in D-  
154 PBS with 10 µL of CD11b (Microglia) MicroBeads (#130-093-636, Miltenyi Biotec) per 10<sup>7</sup> total  
155 cells. After mixing well, cells were incubated for 15 minutes at 2-8°C protected from light. Cells  
156 were washed with 1 mL of 0.5% BSA in D-PBS and pelleted at 300 x g for 10 minutes. The cell  
157 pellet was resuspended in 500 µL of 0.5% BSA in D-PBS. After priming the autoMACS Pro  
158 Separator (#130-092-545, Miltenyi Biotec), sample and collection tubes were placed in a cold  
159 Chill5 tube rack (#130-092-951, Miltenyi Biotec) with both positive and negative fractions being  
160 collected. The double-positive selection (Posseld) program (ie., positive fraction cells are then run  
161 over a second magnetic column for higher purity) was used to elute highly pure Cd11b+ cells in  
162 500 µL. Following separation, the positive fraction was reserved for further applications and  
163 analysis.

#### 164 **Antibody Labeling for FACS**

165 Cell suspensions were pelleted at 300 x g for 10 minutes at 4°C and resuspended in 96 µL of  
166 0.5% BSA in D-PBS, 2 µL of Cd11b-APC antibody (M1/70, #130-113-793, Miltenyi Biotec), and 2  
167 µL of Cd45-VioBlue antibody (REA737, #130-110-802, Miltenyi Biotec). After mixing well, cells  
168 were incubated for 10 minutes in the refrigerator (2-8°C) protected from light. Cells were washed  
169 with 1 mL of 0.5% BSA in D-PBS and pelleted at 300 x g for 10 minutes. Cells suspensions from  
170 half brains were processed in parallel for Cartridge-Based FACS (MACSQuant Tyto) and  
171 Cytometer-Based FACS (FACSAria).

#### 172 **Cartridge-based FACS (MACSQuant Tyto)**

173 Stained cell pellets were resuspended in 10 mL of 0.5% BSA in D-PBS. A MACSQuant Tyto  
174 Cartridge (#130-106-088, Miltenyi Biotec) was primed using 1 mL of 0.5% BSA in D-PBS. The

175 cell suspension was then filtered through 20  $\mu\text{m}$  Pre-Separation Filters (#130-101-812, Miltenyi  
176 Biotec). An aliquot of 500  $\mu\text{L}$  of filtered cell suspension was saved as the Tyto Input fraction for  
177 analysis. The remaining cell suspension was then loaded into the input chamber of a MACSQuant  
178 Tyto cartridge. After loading labeled cells into the input chamber, the cartridge was scanned into  
179 the MACSQuant Tyto Cell Sorter system (#130-103-931, Miltenyi Biotec) and sorting parameters  
180 were selected. The MACSQuant Tyto cartridge is a sterile, closed, single-use system that relies  
181 on accurate activation of the sort valve to pass cells of interest (in this case microglia) into the  
182 positive sort chamber. Cell speed (or time-of-flight) was determined by the time it took a cell to  
183 pass between two adjacent PMT lasers. In this study, the V1 filter (450/50 nm) of the Violet (405  
184 nm) laser was used as a cell trigger - the first PMT channel used to measure cell speed, to detect  
185 Cd45-Viobblue positive cells at a threshold signal of 20. The B1 filter (525/550) of the blue (488  
186 nm) laser was used as the cell speed channel to detect eGFP<sup>+</sup> cells at a signal threshold of 4. A  
187 blue (488 nm) laser with B1 (525/50 nm) and B2 (585/40 nm) filter combinations was used to gate  
188 on eGFP<sup>+</sup> cells without auto-fluorescence interference. Subsequent gating based on CD11b-APC  
189 fluorescence used a red (638 nm) laser and R1 (655-730 nm) filter. The gating strategy was set  
190 to Cd11b<sup>+</sup>Cd45<sup>+</sup>eGFP<sup>+</sup> for isolation of microglia (**Figure S1**). After completion of the sort, the cells  
191 from the positive fraction chamber were collected. The positive fraction chamber was washed  
192 twice using 450  $\mu\text{L}$  of 0.5% BSA in D-PBS per wash and combined with the initial positive fraction  
193 collection. After sorting was completed, an aliquot of (10%) of the positive fraction was kept for  
194 analysis on the MACSQuant Analyzer 10 Cytometer.

### 195 **Cytometer- based FACS (FACSaria)**

196 Following staining, cells were pelleted and then resuspended in 2 mL of 0.5% BSA in D-PBS for  
197 cytometer-based sorting (FACSaria Illu cell sorter, BD Biosciences). An aliquot of 200  $\mu\text{L}$  stained  
198 cells was saved as input for analysis. A Violet (405 nm) laser was used to gate Cd45-Viobblue  
199 positive cells using a 450/40 nm filter. A Blue (488 nm) laser with 530/30 nm and Yellow-Green  
200 (561 nm) laser with 610/20 nm filter combinations was used to gate on eGFP<sup>+</sup> cells without auto-  
201 fluorescence interference. A Red (640 nm) laser was used to detect Cd11b-APC fluorescence  
202 with a 660/20 nm filter. The gating strategy was set to Cd11b<sup>+</sup>Cd45<sup>+</sup>eGFP<sup>+</sup> for isolation of  
203 microglia (**Figure S2**). After sorting was completed, an aliquot (10%) of the positive fraction was  
204 kept for analysis on the MACSQuant Analyzer 10 Flow Cytometer.

### 205 **Addition of Inhibitors**

206 Transcription and translation inhibitors were included during cell preparation, as previously  
207 described (Marsh et al., 2020) with slight modifications. Briefly, Actinomycin D (#A1410, Sigma-  
208 Aldrich) was reconstituted in DMSO to a concentration of 5mg/mL before being aliquoted and  
209 stored at -20°C protected from light. Triptolide (#T3652, Sigma-Aldrich) was reconstituted in  
210 DMSO to a concentration of 10mM before being aliquoted and stored at -20°C protected from  
211 light. Anisomycin (#A9789, Sigma-Aldrich) was reconstituted in DMSO to a concentration of  
212 10mg/mL before being aliquoted and stored at 4°C protected from light. For the samples to be  
213 treated with inhibitors, 2 µL each of Actinomycin D, Triptolide, and Anisomycin stocks were added  
214 to the initial enzyme 1 mixture prior to dissociation.

### 215 **Flow Cytometry Analysis**

216 For analysis of cell sorting, aliquots of input and positive fractions from each of the sort methods  
217 (AutoMACS, AutoMACS to MACSQuant Tyto, MACSQuant Tyto, FACSARIA) were taken for  
218 analysis on the MACSQuant Analyzer 10 Flow Cytometer. AutoMACS input and positive fractions  
219 were stained with Cd11b-APC (M1/70, #130-113-793, Miltenyi Biotec) and Cd45-Vioblu  
220 (REA737, #130-110-802, Miltenyi Biotec) after completion of the sort, according to manufacturer's  
221 instructions. AutoMACS to MACSQuant Tyto, MACSQuant Tyto, and FACSARIA input and positive  
222 fractions were stained prior to cell sorting. Following staining, cells were resuspended in 500 µL  
223 of 0.5% BSA/D-PBS and run on the MACSQuant Analyzer 10 Flow Cytometer. Post-sort purity  
224 was assessed by: 1) percent eGFP+ singlets and 2) percent Cd11b+Cd45+ singlets (**Figure S3**)  
225 using MACSQuantify v2.13.0 software.

226 To test the effect of transcription and translation inhibitors on the relative abundance of cell types  
227 following cell preparation, aliquots of cells were stained with: 1) Microglial (Cd11b-APC (M1/70,  
228 #130-113-793, Miltenyi Biotec) / Cd45-Vioblu (REA737, #130-110-802, Miltenyi Biotec)), 2)  
229 Neuronal (Cd24-Vioblu (REA743, #130-110-831, Miltenyi Biotec)), 3) Astrocytic (ACSA2-APC  
230 (REA969, #130-116-245, Miltenyi Biotec)), or 4) Oligodendrocytic (O4-APC (REA576, #130-119-  
231 982, Miltenyi Biotec)) fluorophore-conjugated antibodies, according to manufacturer's  
232 instructions. Cells were washed and resuspended in 500 µL and run on the MACSQuant Analyzer  
233 10 Flow Cytometer. Relative cell proportions with and without transcription/translation inhibitors  
234 were assessed (**Figure S4**) using MACSQuantify v2.13.0 software.

### 235 **Translating Ribosome Affinity Purification (TRAP) and RNA extraction**

236 Purification of ribosomal-bound, microglial-specific RNA was performed as previously described  
237 (Chucair-Elliott et al., 2020; Kang et al., 2018; Roh et al., 2018) with slight modifications. For



238 TRAP from whole tissue, a hemisected half-brain was minced into small pieces and homogenized  
239 in 1.5 mL ice-cold complete homogenization buffer (50 mM Tris, pH 7.4; 12 mM MgCl<sub>2</sub>; 100 mM  
240 KCl; 1% NP-40; 1 mg/mL sodium heparin; 1 mM DTT; 100 µg/mL cycloheximide (#C4859-1ML,  
241 Millipore Sigma); 200 units/mL RNaseOUT Recombinant Ribonuclease Inhibitor (#10777019;  
242 ThermoFisher); 0.5 mM Spermidine (#S2626, Sigma), 1X complete EDTA-free Protease Inhibitor  
243 Cocktail (#11836170001; Millipore Sigma)) with a glass dounce tissue grinder set (#D8938; 15  
244 times with pestle A). For TRAP from cells, after pelleting cells at 1000 x g for 10 min at 4°C, cells  
245 were resuspended in 400 µl of complete ice-cold homogenization buffer, transferred to a glass  
246 dounce tissue grinder set, and homogenized 15 times with pestle A. Volume was brought up to  
247 1.5 mL with complete homogenization buffer. Homogenates (from tissue or cells) were transferred  
248 to 2 mL round-bottom tubes and centrifuged at 12,000 x g for 10 minutes at 4°C. After  
249 centrifugation, 100 µL of the supernatant was saved as “RNA” input. The remaining supernatant  
250 was transferred to a 2 mL round-bottom tube and incubated with 5 µg/µl of anti-GFP antibody  
251 (ab290; Abcam) at 4°C with end-over-end rotation for one hour. Dynabeads Protein G for  
252 Immunoprecipitation (#10003D; ThermoFisher) were washed three times in 1 mL ice-cold low-salt  
253 wash buffer (50mM Tris, pH 7.5; 12mM MgCl<sub>2</sub>; 100mM KCl; 1% NP-40; 100µg/mL cycloheximide;  
254 1mM DTT). After removal of the last wash, the homogenate/antibody mixture was transferred to  
255 the 2 mL round-bottom tube containing the washed Protein-G Dynabeads and incubated at 4°C  
256 with end-over-end rotation overnight. Magnetic beads were collected using a DynaMag-2 magnet  
257 and the unbound-ribosomes and associated RNA discarded. Beads and GFP-bound polysomes  
258 were then washed three times with 0.5 mL of high-salt wash buffer (50mM Tris, pH 7.5; 12mM  
259 MgCl<sub>2</sub>; 300mM KCl; 1% NP-40; 100µg/mL cycloheximide; 2mM DTT). Following the last wash,  
260 350 µL of Buffer RLT (Qiagen, Germantown, MD) supplemented with 3.5 µl 2-β mercaptoethanol  
261 (#444203, Sigma) was added directly to the beads and incubated with mixing on a ThermoMixer  
262 (Eppendorf) for 10 minutes at room temperature. The beads were magnetically separated and  
263 the supernatant containing the target bead-bound polysomes and associated RNA was  
264 transferred to a new tube. 350 µl of 100% ethanol was added to the tube (“TRAP” fraction:  
265 enriched in transcriptome associated to EGFP-tagged ribosomes) and then loaded onto a RNeasy  
266 MinElute column (Qiagen). RNA was isolated using RNeasy Mini Kit (#74104, Qiagen), according  
267 to manufacturer’s instructions. RNA was quantified with a Nanodrop 2000c spectrophotometer  
268 (ThermoFisher Scientific) and its quality assessed by HSRNA screentape with a 2200 TapeStation  
269 analyzer (Agilent Technologies).

## 270 **Library construction and RNA sequencing (RNA-seq)**

271 Directional RNA-Seq libraries were made from 5-100 ng RNA, as previously described (Chucair-  
272 Elliott et al., 2020; Chucair-Elliott et al., 2019). Briefly, poly-adenylated RNA was captured using  
273 NEBNext Poly(A) mRNA Magnetic Isolation Module (#NEBE7490L; New England Biolabs,  
274 Ipswich, MA) and then processed using NEBNext Ultra II Directional Library Prep Kit for Illumina  
275 (#NEBE7760L; New England Biolabs) for the creation of cDNA libraries, according to the  
276 manufacturer's instruction. Library sizing was performed with HSRNA ScreenTape (#5067-5579;  
277 Agilent Technologies) and libraries were quantified by Qubit HSDNA (#Q32851, Thermo). The  
278 libraries for each sample were pooled at 4 nM concentration and sequenced using an Illumina  
279 NovaSeq 6000 system (SP PE50bp, S4 PE150) at the OMRF Clinical Genomics Center. The  
280 entirety of the sequencing data is available for download in FASTQ format from NCBI Sequence  
281 Read Archive (GSE179721).

## 282 **RNA-Seq Data Analysis**

283 Following sequencing, reads were trimmed and aligned prior to differential expression statistics  
284 and correlation analyses in Strand NGS software package (v4.0) (Strand Life Sciences). Reads  
285 were aligned against the mm10 build of the mouse genome (2014.11.26). Alignment and filtering  
286 criteria included: adapter trimming, fixed 2bp trim from 5' and 2bp from 3' ends, a maximum  
287 number of one novel splice allowed per read, a minimum of 90% identity with the reference  
288 sequence, a maximum of 5% gap, and trimming of 3' end with Q<30. Alignment was performed  
289 directionally with Read 1 aligned in reverse and Read 2 in forward orientation. Normalization was  
290 performed with the DESeq2 algorithm (Love, Huber, & Anders, 2014). Transcripts with an average  
291 read count value >5 in at least 100% of the samples in at least one group were considered  
292 expressed at a level sufficient for quantitation per tissue and those transcripts below this level  
293 were considered not detected/not expressed and excluded, as these low levels of reads are close  
294 to background and are highly variable. For statistical analysis of differential expression, a one-  
295 way ANOVA or two-way ANOVA with the factors of TRAP fraction and treatment and a Benjamini-  
296 Hochberg Multiple Testing Correction followed by Student-Newman Keuls post hoc test were  
297 used (FDR<0.1). For those transcripts meeting this statistical criterion, a fold change >|2| cutoff  
298 was used to eliminate those genes which were statistically significant but unlikely to be biologically  
299 significant and orthogonally confirmable due to their very small magnitude of change.  
300 Visualizations of hierarchical clustering and principal component analyses were performed in  
301 Strand NGS (Version 3.1, Bangalore, India). Cell type specific marker gene lists were generated  
302 from the re-analysis published by McKenzie et al. (McKenzie et al., 2018) of immunopurified and  
303 high throughput single cell data from mice as we have described previously (Chucair-Elliott et al.,

304 2020). Over-representation analysis (ORA) was conducted using WEB-based Gene Set  
305 AnaLysis Toolkit (WebGestalt, [www.webgestalt.org](http://www.webgestalt.org))(Liao, Wang, Jaehnig, Shi, & Zhang, 2019;  
306 Wang, Duncan, Shi, & Zhang, 2013; Wang, Vasaikar, Shi, Greer, & Zhang, 2017; B. Zhang, Kirov,  
307 & Snoddy, 2005). Top over-represented biological processes were selected from gene ontology  
308 functional database with no redundant option selected (Hypergeometric test, BHMTc, FDR<0.05)  
309 and background reference gene list of all expressed genes (raw count>5 in all samples from at  
310 least one group). Top over-represented transcription factor targets were selected from network  
311 functional database with all expressed genes as the reference gene list (Hypergeometric test,  
312 BHMTc, FDR<0.05). Heatmaps of over-represented biological processes were created using  
313 Mopheus (<https://software.broadinstitute.org/morpheus>). Upset plot was created using UpSetR v  
314 1.4.0 package (Conway, Lex, & Gehlenborg, 2017) in RStudio v 1.4.1106 with R v 4.0.5.  
315 Previously published microglial *ex vivo* activational lists were compared (Ayata et al., 2018;  
316 Haimon et al., 2018; Marsh et al., 2020) and genes included in at least two of the three previous  
317 studies were considered “*ex vivo* activational transcripts”.

### 318 **Immunocytochemistry and imaging**

319 Brain samples were fixed for 4h in 4% PFA, cryoprotected by sequential incubations in PBS  
320 containing 15% and 30% sucrose, and then frozen in Optimal Cutting Temperature medium  
321 (#4583, Tissue-Tek). Twelve  $\mu\text{m}$ -thick sagittal sections were cryotome-cut (Cryostar NX70,  
322 ThermoFisher Scientific). Tissue sections were rinsed with PBS containing 1% Triton X-100,  
323 blocked for 1h in PBS containing 10% normal donkey serum, and processed for fluorescence  
324 immunostaining and downstream analysis, as previously described (Chucair-Elliott et al., 2020).  
325 The primary antibodies included rabbit anti-GFP (#ab290, 1:100, Abcam, Cambridge, MA), rat  
326 anti-CD11b (#C227, Clone M1/70, 1:100, Leinco Technologies, St. Louis, MO), and rat anti-CD45  
327 (#550539, Clone 30-F111, 1:100, BD Biosciences). Sequential imaging was performed on an  
328 Olympus FluoView confocal laser-scanning microscope (FV1200; Olympus; Center Valley, PA)  
329 at the Dean McGee Eye Institute imaging core facility at OUHSC. Microscope and FLUOVIEW  
330 FV1000 Ver. 1.2.6.0 software (Olympus) settings were identical for samples using the same  
331 staining-antibody combination and at same magnification. The experimental format files were oib.  
332 The Z-stack generated was achieved at 1.26  $\mu\text{m}$  step size with a total of 8 optical slices at 20X  
333 magnification (2X zoom).

## 334 **Results**

335 The goal of this study was to compare microglial sorting techniques and determine the relative  
336 levels of *ex vivo* activation induced during cell preparation and microglial isolation. A schematic  
337 of the experimental design is represented in **Figure 1A**. In the Cx3cr1-NuTRAP mice, following  
338 cre recombination in Cx3cr1+ cells, deletion of the floxed stop cassette causes activation of the  
339 NuTRAP allele, labeling microglial ribosomes with eGFP and nuclei with biotin and mCherry  
340 (Chucair-Elliott et al., 2020). For the first part of the present study, we used eGFP as a sorting  
341 criterion and in the evaluation of post-sort microglial purity, along with Cd11b and Cd45 co-  
342 expression. Colocalization of eGFP with microglial markers Cd11b and Cd45 in Cx3cr1-NuTRAP  
343 brains was verified by immunohistochemistry (**Figure S5**). Enzymatic and mechanical  
344 dissociation of Cx3cr1-NuTRAP brains was performed to generate single-cell suspensions.

### 345 **Flow cytometric analysis of sort fractions from various microglial sorting techniques.**

346 After reserving an aliquot as input, cells were subjected to one of four isolation techniques: 1)  
347 Cd11b+ magnetic-bead based isolation (AutoMACS), 2) Cartridge-based FACS on  
348 Cd11b+/Cd45+/eGFP+ (MACSQuant Tyto), 3) Cytometer-based FACS on  
349 Cd11b+/Cd45+/eGFP+ (FACSARIA), and 4) AutoMACS debulking of cells prior to cartridge-based  
350 FACS (AutoMACS to MACSQuant Tyto) (**Figure 1A**).

351 Aliquots of cell input and positive sort fractions from each of the four sort methods were analyzed  
352 by flow cytometry. All sort methods showed enriched populations of eGFP+ and Cd11b+/Cd45+  
353 singlets in their positive fractions as compared to cell input (**Figure 1B**). The positive fractions of  
354 all sort methods were enriched in eGFP+ singlets as compared to the input fraction (**Figure 1C**;  
355 Two-way ANOVA, main effect of sort fraction, \*\*\* $p < 0.001$ ). The AutoMACS sort resulted in lower  
356 overall percentage of eGFP+ singlets compared to all other sort methods and the FACSARIA sort  
357 resulted in a higher overall percentage of eGFP+ singlets, though all approaches demonstrated  
358 a high level of enrichment (**Figure 1C**; Two-way ANOVA, Tukey's post-hoc, \* $p < 0.05$ ). The positive  
359 fractions of all sort methods were enriched in Cd11b+/Cd45+ singlets as compared to the input  
360 fraction (**Figure 1D**; Two-way ANOVA, Main effect of sort fraction,  $p < 0.001$ ). FACSARIA sort  
361 resulted the highest overall percentage of Cd11b+/Cd45+ singlets (**Figure 1D**; Two-way ANOVA,  
362 Tukey's post-hoc, \* $p < 0.05$ ). Although FACSARIA had higher microglial purity than other sort  
363 methods, it showed a significantly lower yield than the MACSQuant Tyto sort (**Figure 1E**; One-  
364 way ANOVA, Tukey's post-hoc, # $p < 0.05$ ).

### 365 **Comparison of transcriptomic profiles of microglia isolated from various sort methods.**

366 Following cell preparation and isolation using methods displayed in Figure 1A, RNA was isolated  
367 from cells for preparation of stranded RNA-Seq libraries. We first examined enrichment/depletion  
368 of previously published microglial, astrocytic, oligodendrocytic, neuronal, and endothelial markers  
369 in the transcriptomic profiles (Chucair-Elliott et al., 2020; McKenzie et al., 2018) (**Supplemental**  
370 **Table 1**). Each of the four sort methods showed similar levels of enrichment of microglial marker  
371 genes (**Figure 2A**) and depletion of astrocytic, oligodendrocytic, neuronal, and endothelial marker  
372 genes (**Figure 2B-E**) when compared to cell input. In combination with the flow cytometric data  
373 presented in Figure 1, this gives confidence that each of the sort methods are effective in isolating  
374 highly pure populations of microglia.

375 Next, we examined the transcriptomic data in an unbiased manner. Principal component analysis  
376 of all expressed genes (>5 counts in all samples from at least one group) showed clear separation  
377 of cell input from all sort methods in the first component with 81% of the explained variance  
378 (**Figure 2F**). Differentially expressed genes were called by One-way ANOVA with Benjamini-  
379 Hochberg multiple testing correction (BHMTTC) followed by Student-Newman Keuls post hoc  
380 (FDR<0.1, |FC|>2; **Supplemental Table 2**). Hierarchical clustering of the 7378 DEGs shows  
381 separation of cell input from all sort methods with similar patterning of enrichment and depletion  
382 of DEGs across all sort methods scaled to cell input (**Figure 2G**). The majority of pairwise DEGs  
383 (sort method v cell input) were in common between all sort methods (7084/7378 = 96%) (**Figure**  
384 **2H**), suggesting a high degree of similarity between each of the sort methods. In addition, 5322  
385 DEGs (72%) that were down and 1759 DEGs (24%) were up in all sort methods compared to cell  
386 input. There were 297 discordant DEGs (4%) between the different sort methods as compared to  
387 cell input (**Figure 2I**).

388 Over-representation analysis of gene ontology (ORA GO) of the 1759 genes that were up across  
389 all sort methods identified 177 over-represented biological processes pathways (BHMTTC,  
390 FDR<0.05; **Supplemental Table 3**). Examination of the top 10 over-represented biological  
391 processes reveals several pathways involved in microglial function, including: cytokine-mediated  
392 signaling, immune response activation, and adaptive immune response, among others (**Figure**  
393 **2J**). Running a similar ORA GO on the 5322 genes down across all sort methods (compared to  
394 cell input) revealed 252 over-represented biological processes (BHMTTC, FDR<0.05;  
395 **Supplemental Table 3**). The top 10 processes include many neuron-focused pathways, such as:  
396 neurotransmitter transport, neurotransmitter level regulation, and membrane potential regulation  
397 (**Figure 2K**), indicating depletion of these genes in the sorted cells.

398 Next, we examined the common 1759 up-regulated and 5322 down-regulated genes across the  
399 four sort methods for over-representation of transcription factor targets. Network ORA on the 1759  
400 genes enriched in the positive fraction of all sort methods identified 21 over-represented  
401 transcription factor targets, including the top five hits: Elf1, Ets2, Irf, Pu1, and Nfkb (**Figure 2L,**  
402 **Supplemental Table 3**). Three of the top five transcription factor targets (Elf1, Ets2, PU.1) are  
403 part of the ETS family of transcription factors that assist in regulating immunity (Gallant &  
404 Gilkeson, 2006), with PU.1 being a “master regulator” of microglial identity and function (Yeh &  
405 Ikezu, 2019). The other two transcription factors (Irf and Nfkb) are also critical regulators of  
406 inflammation and antiviral response (Iwanaszko & Kimmel, 2015), an important function of  
407 microglia.

408 Network ORA of the 5322 genes down in all sort methods compared to input identified 468 over-  
409 represented transcription factor targets, including top five hits: Ap1, Tata, Lef1, Pax4, and Ap4.  
410 Ap1 transcription factors are of the Jun and Fos family and have been shown to interact with  
411 Brain-derived neurotrophic factor (BDNF) to modulate neuronal synaptic plasticity. Lef1 is an  
412 endothelium-specific transcription factor (Hupe et al., 2017). Ap4 is an adaptor protein complex  
413 that is involved in vesicular trafficking of membrane proteins. Lack of Ap4 has been shown to  
414 cause accumulation of axonal autophagosomes containing AMPA receptor components in  
415 hippocampal neurons and cerebellar Purkinje cells (Matsuda et al., 2008). Overall, the top  
416 transcription factor targets of the genes depleted in the sort fractions (compared to input) are non-  
417 microglial regulators.

418 In combination, the flow cytometric data, distribution of marker gene enrichments/depletion, and  
419 analysis of differentially expressed genes (including pathway and transcription factor analysis)  
420 suggest that each of the sort methods are producing highly pure populations of microglia with  
421 very similar transcriptomic profiles.

#### 422 **Comparison of TRAP-isolated microglial transcriptome from tissue homogenate, cell** 423 **suspension, and various microglial sort methods.**

424 A schematic of the experimental design is represented in **Figure 3A**. Cx3cr1-NuTRAP brains  
425 were hemisected and processed in halves for whole-tissue homogenization or enzymatic and  
426 mechanical dissociation to create single cell suspensions. Single cell suspensions were then  
427 sorted using one of four methods: 1) Cd11b magnetic-bead based isolation (AutoMACS), 2)  
428 Cartridge-based FACS on Cd11b+/Cd45+/eGFP+ (MACSQuant Tyto), 3) Cytometer-based

429 FACS on Cd11b+/Cd45+/eGFP+ (FACSAria), or 4) AutoMACS debulking of cells prior to  
430 cartridge-based FACS (AutoMACS to MACSQuant Tyto), as before. Tissue homogenate (Tissue-  
431 TRAP), mixed-cell suspension (Cell-TRAP), and sorted microglia (Sort-TRAP) were then  
432 subjected to TRAP pull-down of microglial-specific translating RNA for creation of RNA-Seq  
433 libraries.

434 Each of the four Sort-TRAP methods showed similar levels of enrichment of microglial marker  
435 genes (**Figure 3D**). Depletion of astrocytic, oligodendrocytic, neuronal, and endothelial marker  
436 genes (**Figure 3E-H**) was greater in Sort-TRAP methods as compared to Cell-TRAP (One-way  
437 ANOVA, Tukey's post-hoc, \*\*\* $p < 0.001$ ). This shows that the extra enrichment step of sorting  
438 microglia followed by TRAP-isolation of translating microglial RNA, leads to more pure microglial  
439 RNA than Tissue-TRAP or Cell-TRAP alone.

440 In recent years, several studies have suggested that cell-isolation methods cause *ex vivo*  
441 activational effects in microglia (Ayata et al., 2018; Haimon et al., 2018; Marsh et al., 2020). In  
442 this section, our goal was to determine if different sorting techniques result in different levels of  
443 *ex vivo* activation. We used Tissue-TRAP as an “unactivated” microglial reference group, since  
444 the Tissue-TRAP method does not rely on the creation of a cell suspension or cell sorting  
445 techniques. There were 8076 DEGs between the translomes when Cell- and Sort-TRAP  
446 methods were compared to the Tissue-TRAP reference (One-way ANOVA, BHMTc, SNK  
447  $FDR < 0.1$ ,  $|FC| > 2$ ). Upset plot of the 8076 DEGs shows the majority of the DEGs  
448 (7800/8076=97%) are in common between all groups (Cell-/Sort-TRAP v. Tissue-TRAP) (**Figure**  
449 **4A, Supplemental Table 5**). Hierarchical clustering of all 8076 DEGs shows distinct clustering of  
450 Tissue-TRAP from all other groups. Cell-TRAP also clusters separately from the Sort-TRAP  
451 groups. These data, together with cell-type enrichments from **Figure 3D-H**, suggests that the act  
452 of creating a cell-suspension is the largest contributor to differences seen between Tissue-TRAP  
453 and Sort-TRAP methods.

454 Next, we identified over-represented pathways among the up-regulated genes compared to  
455 Tissue-TRAP. The top 10 biological processes of the 2329 genes up-regulated in comparison to  
456 Tissue-TRAP were microglial-related pathways, including: myeloid leukocyte activation, cell  
457 activation involved in immune response, and leukocyte-mediated immunity (**Figure 4D**;  
458 **Supplemental Table 5**). Comparing the biological processes identified in the transcriptomic  
459 analysis (**Figure 2J**; **Supplemental Table 2**) and the translomic analysis (**Figure 4D**;  
460 **Supplemental Table 5**) revealed 55 biological processes that were only up-regulated in the

461 translome (**Figure 4E**). Several of the biological processes uniquely upregulated in the  
462 translome comparisons were involved in microglial activation pathways, including: response to  
463 type I interferon (IFN), response to transforming growth factor beta (TGFB), response to  
464 interleukin-6 (IL-6), and NIK/NF-kappaB signaling (NFKB) (**Figure 4F**). IL-6 is a pro-inflammatory  
465 cytokine extensively studied in brain aging and disease (Borovcanin et al., 2017; Singh-Manoux  
466 et al., 2014; Ye & Johnson, 1999). Microglia have higher IL-6 receptor (IL-6R) expression than any  
467 other cell type. As such, microglia are highly responsive to IL-6 and transition into a “primed” state  
468 when exposed to high levels of IL-6 (Garner, Amin, Johnson, Scarlett, & Burton, 2018).  
469 Hierarchical clustering of the “Response to IL-6” pathway genes showed overall higher levels of  
470 expression in Cell- and Sort-TRAP groups (**Figure 4G; Supplemental Table 5**). The Cell-TRAP  
471 did not cluster separately from the Sort-TRAP groups, providing further evidence that the *ex vivo*  
472 activational signature is a function of cell preparation.

473 Next, we looked at gene expression of common cytokines (**Figure 4H; Supplemental Table 5**)  
474 and chemokines (**Figure 4I; Supplemental Table 5**) across Tissue-, Cell-, and Sort- TRAP  
475 groups. We observed higher levels of cytokine and chemokine transcripts across all Cell- and  
476 Sort-TRAP groups when compared to Tissue-TRAP (One-way ANOVA, BHMT, SNK FDR<0.1,  
477 |FC|>2). In an effort to cross-validate our finding with previous studies, we intersected *ex vivo*  
478 microglial activational gene lists from three previous studies (Ayata et al., 2018; Haimon et al.,  
479 2018; Marsh et al., 2020) and identified 21 *ex vivo* activational transcripts represented in at least  
480 two of the studies (**Figure 4J; Supplemental Table 5**). PCA of the TRAP data from the present  
481 study on the 21 *ex vivo* activational genes shows clear separation of Tissue-TRAP from all other  
482 groups in the first component (92.8% explained variance) (**Figure 4K**). Again, suggesting that the  
483 *ex vivo* signature is a function of cell preparation. Hierarchical clustering of the 21 activational  
484 genes, shows similar patterning as in the “Response to IL-6” pathway with higher levels of  
485 expression across Cell- and Sort-TRAP groups compared to Tissue-TRAP (**Figure 4L;**  
486 **Supplemental Table 5**). *Zfp36* was one of the *ex vivo* activational genes identified in all three  
487 previous studies (Ayata et al., 2018; Haimon et al., 2018; Marsh et al., 2020). Zinc finger protein  
488 36 (*Zfp36*) encodes for the protein Tristetraprolin (TTP) which is involved in regulating immune  
489 responses through mRNA destabilizing and alternative splicing (Tu et al., 2019). *Zfp36* is enriched  
490 in Cell- and Sort-TRAP compared to Tissue TRAP (One-Way ANOVA, Tukey’s posthoc,  
491 \*\*\*p<0.001).



492 In summary, these data suggest that *ex vivo* microglial activation is primarily occurring during cell  
493 preparation and is sustained through microglial isolation by various sort methods but there were  
494 no major differences between the different sort methods.

#### 495 **Changes in cellularity and *ex vivo* activational profiles following cell preparation.**

496 Since enzymatic and mechanical dissociation during cell preparation induced *ex vivo* activational  
497 artifacts, we next compared the cellularity and *ex vivo* activational profiles using whole-tissue  
498 homogenization and enzymatical/mechanical cell preparation (**Figure 5A**). Normally, flow  
499 cytometry is the method of choice in estimating relative cell proportions within a cell suspension.  
500 However, these proportions do not account for biased cellular loss during cell preparation.  
501 CIBERSORTx, or digital cytometry, estimates cell-type abundance from bulk transcriptomics.  
502 Using publicly available cell-type specific data from mouse brain (Y. Zhang et al., 2014)  
503 (GSE52564) as a digital cytometry reference matrix, we estimated cell proportions in Tissue Input  
504 and Cell Input. There was a decrease in estimated neuronal abundance between Tissue Input  
505 (86.4%) and Cell Input (8.7%) and an increase in estimated microglial, astrocytic, endothelial, and  
506 oligodendrocytic abundance with cell preparation (**Figure 5B; Supplemental Table 6**).  
507 Consistent with our CIBERSORTx results, Cell Input was enriched for microglial, astrocytic,  
508 oligodendrocytic, and endothelial cell transcripts compared to Tissue Input. Cell-TRAP revealed  
509 greater enrichment of microglial cell markers and depletion of astrocytic and oligodendrocytic cell  
510 markers than in Tissue-TRAP. (**Figure 5C; Supplemental Table 6**) (One-way ANOVA, Tukey's  
511 post-hoc, \*\* $p < 0.01$ , \*\*\* $p < 0.001$ ). Examining *ex vivo* activational signature genes (Cytokines,  
512 Chemokines, Response to IL-6) reveals strong induction with cell preparation (**Figure 5D;**  
513 **Supplemental Table 6**). The 21-common *ex vivo* activation signature genes also showed a  
514 similar pattern of expression with cell preparation, with high expression in Cell-Input and Cell-  
515 TRAP as compared to their tissue counterparts (**Figure 5E; Supplemental Table 6**).

#### 516 **Effect of transcriptional and translational inhibitors on *ex vivo* activational profiles** 517 **following cell preparation.**

518 Recent studies have suggested that inclusion of transcriptional and/or translational inhibitors  
519 during cell preparation can prevent *ex vivo* activational confounds in microglia (Marsh et al., 2020)  
520 and other neuronal cell types (Wu et al., 2017). To test the effect of transcriptional and  
521 translational inhibitors on the transcriptome and translome from cell suspension, we  
522 supplemented our cell preparation enzymatic mix with transcriptional and translations inhibitors:  
523 Actinomycin D, Triptolide, and Anisomycin. To assess the effect of transcriptional and

524 translational inhibitors on the *ex vivo* activational state of microglia following cell preparation, the  
525 TRAP-isolated translatomers from tissue homogenate (Tissue-TRAP) was compared to TRAP  
526 from isolated cells without inhibitors (Cell TRAP – inhibitors) and with inhibitors (Cell TRAP +  
527 inhibitors) (**Figure 6A**). There were 121 genes that were higher in Cell TRAP - inhibitors compared  
528 to Tissue-TRAP. The majority (111/121=92%) of the genes that were induced during cell  
529 preparation were prevented by the addition of transcriptional and translational inhibitors during  
530 cell preparation (**Figure 6B**; **Supplemental Table 7**). Heatmap of the 111 *ex vivo* activational  
531 transcripts identified in **Figure 6B** shows addition of inhibitors during cell preparation partially  
532 ameliorates the *ex vivo* activational confounds induced by enzymatic and mechanical dissociation  
533 of brain tissue (**Figure 6C**; **Supplemental Table 7**). Top 10 biological processes over-  
534 represented in the 111 *ex vivo* activational genes prevented by the addition of inhibitors include:  
535 chemokine response, bacterial molecule response, and mechanical stimulus response, among  
536 others (**Figure 6D**; **Supplemental Table 7**). Heatmap of response to mechanical stimulus  
537 pathway genes (**Figure 6E**; **Supplemental Table 7**) and response to chemokine (**Figure 6F**;  
538 **Supplemental Table 7**) show prevention of pathway induction with the use of transcription and  
539 translation inhibitors during cell preparation.

540 PCA of the 21 *ex vivo* activational transcripts identified in at least two of the three examined  
541 previous studies (Ayata et al., 2018; Haimon et al., 2018; Marsh et al., 2020) shows strong  
542 separation of Cell TRAP - inhibitors from Tissue-TRAP in the first component (90.9% explained  
543 variance). Addition of transcription and translation inhibitors during cell preparation migrated the  
544 Cell TRAP +inhibitors group closer to the Tissue-trap group in the first component (**Figure 6G**).  
545 Heatmap of the 21 *ex vivo* activational transcripts shows prevention of *ex vivo* activation with the  
546 addition of transcriptional and translational inhibitors (**Figure 6H**; **Supplemental Table 7**).

547 In summary, the addition of transcriptional and translational inhibitors during enzymatic and  
548 mechanical dissociation of brain tissue can prevent *ex vivo* activational artifacts in microglia.

#### 549 **Effect of transcriptional and translational inhibitors on cell abundance following cell** 550 **preparation.**

551 To verify that the prevention of *ex vivo* artifacts with the addition of inhibitors was not a result of  
552 altered cellularity during cell preparation, the Cell Input + Inhibitors was compared to Cell Input –  
553 Inhibitors and Tissue Input for changes in relative cell abundance by flow cytometry and  
554 transcriptomic analyses. Schematic of this workflow is represented in **Figure 7A**.

555 Digital cytometry (CIBERSORTx) analysis on Tissue Input and Cell Input (+/- Inhibitors) showed  
556 differences in relative cell abundance between Cell Input (+/- Inhibitors) compared to Tissue Input  
557 (One-way ANOVA, Tukey's post-hoc,  $*p<0.05$ ). However, there were no significant differences in  
558 the relative cell-type proportions between Cell Input + Inhibitors compared to Cell Input – Inhibitors  
559 (**Figure 7B; Supplemental Table 8**). Next, we assessed the relative enrichment/depletion of  
560 microglial, astrocytic, oligodendrocytic, neuronal, and endothelial cell markers. Consistent with  
561 the results from **Figure 5**, we observed an overall enrichment of microglial, astrocytic,  
562 oligodendrocytic, and endothelial cell markers and depletion of neuronal cell markers in Cell Input  
563 (+/- Inhibitors) compared to Tissue Input. There was a small but significant difference in microglial  
564 and oligodendrocytic marker enrichment between Cell Input – Inhibitors and Cell Input + Inhibitors  
565 (Paired t-test, Bonferonni correction,  $*p<\alpha=0.01$ ) (**Figure 7C; Supplemental Table 8**). Flow  
566 cytometric analysis of cell type-specific markers revealed a small, but significant, difference in the  
567 relative abundance of oligodendrocytes with the addition of transcription and translation inhibitors  
568 as evidenced by the increase in O4+ singlets (Paired t-test, Bonferonni correction,  $*p<\alpha=0.0125$ )  
569 (**Figure 7D; Supplemental Table 8**). In summary, the addition of transcriptional and translational  
570 inhibitors causes minimal changes in the relative abundance of cell types following cell  
571 preparation.

## 572 **Discussion**

573 Microglia have emerged as key players in brain disease, including age-related neuroinflammation  
574 and neurodegeneration (Colonna & Butovsky, 2017; Lana, Ugolini, Nosi, Wenk, & Giovannini,  
575 2021). As a minority cell population in the brain, in depth microglial molecular and biochemical  
576 analyses benefit from enrichment strategies to provide cell-specific data (Okaty, Sugino, &  
577 Nelson, 2011). While *in vitro* cell culture models are useful for mechanistic studies, they fail to  
578 recapitulate the complexity of the nervous system milieu. As such, models and methods to  
579 'debulk' microglia from brain tissue have become a focus in the field (Chucair-Elliott et al., 2020;  
580 McKinsey et al., 2020). The most common methods for isolating microglia include enzymatic  
581 and/or mechanical dissociation of brain tissue followed by immunolabeling with magnetic beads  
582 (Bordt et al., 2020) or fluorescent-conjugated antibodies for FACS-based enrichment (Bohlen,  
583 Bennett, & Bennett, 2019). As these methods have continued to evolve, quantitative comparisons  
584 of these methods are needed to aid decision making of what approaches to use in specific studies.  
585 As well, there are legitimate concerns that these isolation approaches introduce artifacts,  
586 especially in glial cell populations which by nature are sensitive to changes in their  
587 microenvironment (Wu et al., 2017). Determining the degree of *ex vivo* activational artifacts and

588 how they may vary between isolation approaches, has been challenging because the field lacked  
589 a resting cell type-specific reference (absent of *ex vivo* activational confounds related to  
590 enzymatic/mechanical dissociation) as a comparator.

591 To address this barrier to progress, we used a ribosomal-tagging model (NuTRAP) in combination  
592 with a microglial-specific cre (Cx3cr1-cre/ERT2) to generate a microglial signature without the  
593 confounds of cell isolation. We then compared relative microglial enrichment and *ex vivo*  
594 activational artifacts between multiple MACS- and FACS-based cell isolation techniques. All sort  
595 methods were successful in isolating highly pure microglia, as evidenced by flow cytometric and  
596 transcriptomic analyses. Our MACS - FACS comparison is in line with previous findings on yield  
597 and speed (Pan & Wan, 2020). Magnetic bead-based isolation produced nearly as pure of a  
598 microglial population as FACS based approaches. The advantages of the magnetic bead isolation  
599 include the rapid isolation (<1hr), multiplexing 6 samples at a time, and least amount of  
600 instrumentation. The limitation of magnetic bead-based approaches is the single dimension of  
601 labeling as compared to FACS. Cartridge-based FACS is a new iteration of FACS and produced  
602 nearly equivalent cell purities as traditional cytometry-based FACS with greater cell yield. Another  
603 advantage of this cartridge-based approach is the self-contained nature of the system that does  
604 not produce aerosols thus not requiring biosafety containment (Roberts et al., 2021). Cytometry-  
605 based FACS produced the purest cell population and has the highest capabilities for dimensions  
606 of labeling. However, this approach is also the slowest and had the lowest cellular yield. A strict  
607 comparison of FACS methods relies on details of the gating strategies used and these can likely  
608 be tuned to emphasize highest purity or cell yield in both approaches. Combining MACS with  
609 cartridge-based FACS, to initially de-bulk microglia and then further purify, did not result in higher  
610 purity of microglia and the presence of the magnetic beads shifted signals in the FACS. Taken  
611 together, these data demonstrate that all of these approaches are valid for microglial isolation  
612 from brain and return highly pure cell populations that are suitable for molecular and biochemical  
613 analyses.

614 An unexpected finding of the analyses was the shift in cellularity caused by the cell suspension  
615 preparation. Neuronal cells and transcriptomic signals were depleted during cell preparation.  
616 While this has the effect of aiding microglial isolation by diminishing the majority neuronal cell  
617 population, this has profound effects on neuronal cell isolation studies. Outside of these studies,  
618 others have observed that alternative cell preparation methods cause less neuronal cell loss  
619 (Saxena et al., 2012). We did not test alternate cell preparation approaches such as these for  
620 their differential effects on microglial *ex vivo* activation and it remains possible that these different

621 methods, through causing less cell death, could lead to less microglial activation. The large  
622 neuronal loss during cell preparation may contribute to microglia activation *ex vivo*.

623 Using TRAP isolation of the microglial transcriptome as a baseline measure of microglia, induction  
624 of *ex vivo* activational pathways occurred during enzymatic and mechanical cell preparation and  
625 was sustained during microglial isolation, independent of sort method. Compared to previous  
626 studies of these activational artifacts (Ayata et al., 2018; Haimon et al., 2018; Marsh et al., 2020)  
627 we found a common set of activational markers centered on immediate early genes. This unified  
628 set of markers can be used in future studies as markers of artifactual microglial cell activation.

629 The use of transcriptional and translational inhibitors (Marsh et al., 2020) during the cell  
630 preparation was investigated in the context of acutely isolating cells for immediate use in  
631 downstream molecular and biochemical analyses. Addition of transcription and translation  
632 inhibitors blocked much of the *ex vivo* activational artifacts without otherwise changing the cell  
633 phenotype. Whether this is a valid approach for cells that will subsequently be cultured was not  
634 assessed. Nonetheless, as studies also delve into microglial heterogeneity at the single cell level  
635 (Masuda, Sankowski, Staszewski, & Prinz, 2020; Stratoulis, Venero, Tremblay, & Joseph, 2019)  
636 inclusion of inhibitors in the preparation and enrichment of microglia can reduce artifacts in these  
637 studies as well (Marsh et al., 2020).

638 Collectively, our data demonstrate that a variety of microglial isolation methods can be used with  
639 equivalent results and tuned to the needs of the specific study. In addition, activational artifacts  
640 occur during cell isolation and can be prevented by inclusion of specific inhibitors early in the cell  
641 preparation protocol. The different cell sorting methods did not show additional activational effects  
642 or differences between methods, indicating that concerns over artifacts should not drive isolation  
643 method selection. Addition of transcriptional and translational inhibitors during cell preparation  
644 reduces *ex vivo* artifacts and is an easily implementable approach to avoid potential confounds.

## 645 References Cited

- 646 Avignone, E., Lepleux, M., Angibaud, J., & Nagerl, U. V. (2015). Altered morphological dynamics of  
647 activated microglia after induction of status epilepticus. *J Neuroinflammation*, *12*, 202.  
648 doi:10.1186/s12974-015-0421-6
- 649 Ayata, P., Badimon, A., Strasburger, H. J., Duff, M. K., Montgomery, S. E., Loh, Y.-H. E., . . . Schaefer, A.  
650 (2018). Epigenetic regulation of brain region-specific microglia clearance activity. *Nature*  
651 *Neuroscience*, *21*(8), 1049-1060. doi:10.1038/s41593-018-0192-3
- 652 Bohlen, C. J., Bennett, F. C., & Bennett, M. L. (2019). Isolation and Culture of Microglia. *Curr Protoc*  
653 *Immunol*, *125*(1), e70. doi:10.1002/cpim.70
- 654 Bordt, E. A., Block, C. L., Petrozziello, T., Sadri-Vakili, G., Smith, C. J., Edlow, A. G., & Bilbo, S. D. (2020).  
655 Isolation of Microglia from Mouse or Human Tissue. *STAR Protoc*, *1*(1).  
656 doi:10.1016/j.xpro.2020.100035
- 657 Borovcanin, M. M., Jovanovic, I., Radosavljevic, G., Pantic, J., Minic Janicijevic, S., Arsenijevic, N., & Lukic,  
658 M. L. (2017). Interleukin-6 in Schizophrenia—Is There a Therapeutic Relevance? *Frontiers in*  
659 *Psychiatry*, *8*(221). doi:10.3389/fpsy.2017.00221
- 660 Butovsky, O., & Weiner, H. L. (2018). Microglial signatures and their role in health and disease. *Nat Rev*  
661 *Neurosci*, *19*(10), 622-635. doi:10.1038/s41583-018-0057-5
- 662 Cahoy, J. D., Emery, B., Kaushal, A., Foo, L. C., Zamanian, J. L., Christopherson, K. S., . . . Barres, B. A.  
663 (2008). A transcriptome database for astrocytes, neurons, and oligodendrocytes: a new resource  
664 for understanding brain development and function. *J Neurosci*, *28*(1), 264-278.  
665 doi:10.1523/JNEUROSCI.4178-07.2008
- 666 Chucair-Elliott, A. J., Ocanas, S. R., Stanford, D. R., Ansere, V. A., Buettner, K. B., Porter, H., . . . Freeman,  
667 W. M. (2020). Inducible cell-specific mouse models for paired epigenetic and transcriptomic  
668 studies of microglia and astroglia. *Commun Biol*, *3*(1), 693. doi:10.1038/s42003-020-01418-x
- 669 Chucair-Elliott, A. J., Ocanas, S. R., Stanford, D. R., Hadad, N., Wronowski, B., Otalora, L., . . . Freeman, W.  
670 M. (2019). Tamoxifen induction of Cre recombinase does not cause long-lasting or sexually  
671 divergent responses in the CNS epigenome or transcriptome: implications for the design of aging  
672 studies. *Geroscience*, *41*(5), 691-708. doi:10.1007/s11357-019-00090-2
- 673 Colonna, M., & Butovsky, O. (2017). Microglia Function in the Central Nervous System During Health and  
674 Neurodegeneration. *Annu Rev Immunol*, *35*, 441-468. doi:10.1146/annurev-immunol-051116-  
675 052358
- 676 Conway, J. R., Lex, A., & Gehlenborg, N. (2017). UpSetR: an R package for the visualization of intersecting  
677 sets and their properties. *Bioinformatics*, *33*(18), 2938-2940. doi:10.1093/bioinformatics/btx364
- 678 Cuadros, M. A., & Navascues, J. (1998). The origin and differentiation of microglial cells during  
679 development. *Prog Neurobiol*, *56*(2), 173-189. doi:10.1016/s0301-0082(98)00035-5
- 680 Dubbelaar, M. L., Kracht, L., Eggen, B. J. L., & Boddeke, E. W. G. M. (2018). The Kaleidoscope of  
681 Microglial Phenotypes. *Frontiers in immunology*, *9*, 1753-1753. doi:10.3389/fimmu.2018.01753
- 682 Gallant, S., & Gilkeson, G. (2006). ETS transcription factors and regulation of immunity. *Archivum*  
683 *Immunologiae et Therapiae Experimentalis*, *54*(3), 149-163. doi:10.1007/s00005-006-0017-z
- 684 Garner, K. M., Amin, R., Johnson, R. W., Scarlett, E. J., & Burton, M. D. (2018). Microglia priming by  
685 interleukin-6 signaling is enhanced in aged mice. *Journal of neuroimmunology*, *324*, 90-99.  
686 doi:10.1016/j.jneuroim.2018.09.002
- 687 Haimon, Z., Volaski, A., Orthgiess, J., Boura-Halfon, S., Varol, D., Shemer, A., . . . Jung, S. (2018). Re-  
688 evaluating microglia expression profiles using RiboTag and cell isolation strategies. *Nat Immunol*,  
689 *19*(6), 636-644. doi:10.1038/s41590-018-0110-6
- 690 Han, J., Fan, Y., Zhou, K., Blomgren, K., & Harris, R. A. (2021). Uncovering sex differences of rodent  
691 microglia. *J Neuroinflammation*, *18*(1), 74. doi:10.1186/s12974-021-02124-z

- 692 Hickman, S. E., Kingery, N. D., Ohsumi, T. K., Borowsky, M. L., Wang, L. C., Means, T. K., & El Khoury, J.  
693 (2013). The microglial sensome revealed by direct RNA sequencing. *Nat Neurosci*, *16*(12), 1896-  
694 1905. doi:10.1038/nn.3554
- 695 Holt, L. M., & Olsen, M. L. (2016). Novel Applications of Magnetic Cell Sorting to Analyze Cell-Type  
696 Specific Gene and Protein Expression in the Central Nervous System. *PLoS One*, *11*(2), e0150290.  
697 doi:10.1371/journal.pone.0150290
- 698 Hupe, M., Li, M. X., Kneitz, S., Davydova, D., Yokota, C., Kele, J., . . . Gessler, M. (2017). Gene expression  
699 profiles of brain endothelial cells during embryonic development at bulk and single-cell levels.  
700 *Science Signaling*, *10*(487), eaag2476. doi:10.1126/scisignal.aag2476
- 701 Iwanaszko, M., & Kimmel, M. (2015). NF- $\kappa$ B and IRF pathways: cross-regulation on target genes  
702 promoter level. *BMC genomics*, *16*(1), 307-307. doi:10.1186/s12864-015-1511-7
- 703 Kang, S. S., Ebbert, M. T. W., Baker, K. E., Cook, C., Wang, X., Sens, J. P., . . . Fryer, J. D. (2018). Microglial  
704 translational profiling reveals a convergent APOE pathway from aging, amyloid, and tau. *J Exp  
705 Med*, *215*(9), 2235-2245. doi:10.1084/jem.20180653
- 706 Lana, D., Ugolini, F., Nosi, D., Wenk, G. L., & Giovannini, M. G. (2021). The Emerging Role of the Interplay  
707 Among Astrocytes, Microglia, and Neurons in the Hippocampus in Health and Disease. *Front  
708 Aging Neurosci*, *13*, 651973. doi:10.3389/fnagi.2021.651973
- 709 Liao, Y., Wang, J., Jaehnig, E. J., Shi, Z., & Zhang, B. (2019). WebGestalt 2019: gene set analysis toolkit  
710 with revamped UIs and APIs. *Nucleic Acids Res*, *47*(W1), W199-W205. doi:10.1093/nar/gkz401
- 711 Love, M. I., Huber, W., & Anders, S. (2014). Moderated estimation of fold change and dispersion for  
712 RNA-seq data with DESeq2. *Genome Biol*, *15*(12), 550. doi:10.1186/s13059-014-0550-8
- 713 Marsh, S. E., Kamath, T., Walker, A. J., Dissing-Olesen, L., Hammond, T. R., Young, A. M. H., . . . Stevens,  
714 B. (2020). Single Cell Sequencing Reveals Glial Specific Responses to Tissue Processing  
715 & Enzymatic Dissociation in Mice and Humans. *bioRxiv*, 2020.2012.2003.408542.  
716 doi:10.1101/2020.12.03.408542
- 717 Masuda, T., Sankowski, R., Staszewski, O., & Prinz, M. (2020). Microglia Heterogeneity in the Single-Cell  
718 Era. *Cell Rep*, *30*(5), 1271-1281. doi:10.1016/j.celrep.2020.01.010
- 719 Matsuda, S., Miura, E., Matsuda, K., Kakegawa, W., Kohda, K., Watanabe, M., & Yuzaki, M. (2008).  
720 Accumulation of AMPA receptors in autophagosomes in neuronal axons lacking adaptor protein  
721 AP-4. *Neuron*, *57*(5), 730-745. doi:10.1016/j.neuron.2008.02.012
- 722 McKenzie, A. T., Wang, M., Hauberg, M. E., Fullard, J. F., Kozlenkov, A., Keenan, A., . . . Zhang, B. (2018).  
723 Brain Cell Type Specific Gene Expression and Co-expression Network Architectures. *Sci Rep*, *8*(1),  
724 8868. doi:10.1038/s41598-018-27293-5
- 725 McKinsey, G. L., Lizama, C. O., Keown-Lang, A. E., Niu, A., Santander, N., Larphaveesarp, A., . . . Arnold,  
726 T. D. (2020). A new genetic strategy for targeting microglia in development and disease. *Elife*, *9*.  
727 doi:10.7554/eLife.54590
- 728 Nikodemova, M., & Watters, J. J. (2012). Efficient isolation of live microglia with preserved phenotypes  
729 from adult mouse brain. *J Neuroinflammation*, *9*, 147. doi:10.1186/1742-2094-9-147
- 730 Okaty, B. W., Sugino, K., & Nelson, S. B. (2011). Cell type-specific transcriptomics in the brain. *J Neurosci*,  
731 *31*(19), 6939-6943. doi:10.1523/JNEUROSCI.0626-11.2011
- 732 Pan, J., & Wan, J. (2020). Methodological comparison of FACS and MACS isolation of enriched microglia  
733 and astrocytes from mouse brain. *Journal of Immunological Methods*, *486*, 112834.  
734 doi:<https://doi.org/10.1016/j.jim.2020.112834>
- 735 Prinz, M., Jung, S., & Priller, J. (2019). Microglia Biology: One Century of Evolving Concepts. *Cell*, *179*(2),  
736 292-311. doi:10.1016/j.cell.2019.08.053
- 737 Provenzano, F., Perez, M. J., & Deleidi, M. (2021). Redefining Microglial Identity in Health and Disease at  
738 Single-Cell Resolution. *Trends Mol Med*, *27*(1), 47-59. doi:10.1016/j.molmed.2020.09.001

- 739 Reichard, A., & Asosingh, K. (2019). Best Practices for Preparing a Single Cell Suspension from Solid  
740 Tissues for Flow Cytometry. *Cytometry A*, 95(2), 219-226. doi:10.1002/cyto.a.23690
- 741 Roberts, M. R., Anderson, R., Carmody, W., & Bosio, C. M. (2021). Validation and Application of a  
742 Benchtop Cell Sorter in a Biosafety Level 3 Containment Setting. *Applied Biosafety*(Published  
743 Online:28 Apr 2021).
- 744 Rock, R. B., Gekker, G., Hu, S., Sheng, W. S., Cheeran, M., Lokensgard, J. R., & Peterson, P. K. (2004). Role  
745 of microglia in central nervous system infections. *Clin Microbiol Rev*, 17(4), 942-964, table of  
746 contents. doi:10.1128/CMR.17.4.942-964.2004
- 747 Roh, H. C., Tsai, L. T. Y., Shao, M., Tenen, D., Shen, Y., Kumari, M., . . . Rosen, E. D. (2018). Warming  
748 Induces Significant Reprogramming of Beige, but Not Brown, Adipocyte Cellular Identity. *Cell*  
749 *Metab*, 27(5), 1121-1137 e1125. doi:10.1016/j.cmet.2018.03.005
- 750 Salter, M. W., & Stevens, B. (2017). Microglia emerge as central players in brain disease. *Nat Med*, 23(9),  
751 1018-1027. doi:10.1038/nm.4397
- 752 Saxena, A., Wagatsuma, A., Noro, Y., Kuji, T., Asaka-Oba, A., Watahiki, A., . . . Carninci, P. (2012).  
753 Trehalose-enhanced isolation of neuronal sub-types from adult mouse brain. *Biotechniques*,  
754 52(6), 381-385. doi:10.2144/0000113878
- 755 Sierra, A., Abiega, O., Shahraz, A., & Neumann, H. (2013). Janus-faced microglia: beneficial and  
756 detrimental consequences of microglial phagocytosis. *Front Cell Neurosci*, 7, 6.  
757 doi:10.3389/fncel.2013.00006
- 758 Singh-Manoux, A., Dugravot, A., Brunner, E., Kumari, M., Shipley, M., Elbaz, A., & Kivimaki, M. (2014).  
759 Interleukin-6 and C-reactive protein as predictors of cognitive decline in late midlife. *Neurology*,  
760 83(6), 486. doi:10.1212/WNL.0000000000000665
- 761 Srinivasan, R., Lu, T. Y., Chai, H., Xu, J., Huang, B. S., Golshani, P., . . . Khakh, B. S. (2016). New Transgenic  
762 Mouse Lines for Selectively Targeting Astrocytes and Studying Calcium Signals in Astrocyte  
763 Processes In Situ and In Vivo. *Neuron*, 92(6), 1181-1195. doi:10.1016/j.neuron.2016.11.030
- 764 Stratoulas, V., Venero, J. L., Tremblay, M. E., & Joseph, B. (2019). Microglial subtypes: diversity within  
765 the microglial community. *EMBO J*, 38(17), e101997. doi:10.15252/embj.2019101997
- 766 Tu, Y., Wu, X., Yu, F., Dang, J., Wang, J., Wei, Y., . . . Zhang, Y. (2019). Tristetraprolin specifically regulates  
767 the expression and alternative splicing of immune response genes in HeLa cells. *BMC*  
768 *Immunology*, 20(1), 13. doi:10.1186/s12865-019-0292-1
- 769 Wang, J., Duncan, D., Shi, Z., & Zhang, B. (2013). WEB-based GENE SeT ANALYSIS Toolkit (WebGestalt):  
770 update 2013. *Nucleic Acids Res*, 41(Web Server issue), W77-83. doi:10.1093/nar/gkt439
- 771 Wang, J., Vasaiakar, S., Shi, Z., Greer, M., & Zhang, B. (2017). WebGestalt 2017: a more comprehensive,  
772 powerful, flexible and interactive gene set enrichment analysis toolkit. *Nucleic Acids Res*,  
773 45(W1), W130-W137. doi:10.1093/nar/gkx356
- 774 Wu, Y. E., Pan, L., Zuo, Y., Li, X., & Hong, W. (2017). Detecting Activated Cell Populations Using Single-Cell  
775 RNA-Seq. *Neuron*, 96(2), 313-329 e316. doi:10.1016/j.neuron.2017.09.026
- 776 Ye, S. M., & Johnson, R. W. (1999). Increased interleukin-6 expression by microglia from brain of aged  
777 mice. *J Neuroimmunol*, 93(1-2), 139-148. doi:10.1016/s0165-5728(98)00217-3
- 778 Yeh, H., & Ikezu, T. (2019). Transcriptional and Epigenetic Regulation of Microglia in Health and Disease.  
779 *Trends in molecular medicine*, 25(2), 96-111. doi:10.1016/j.molmed.2018.11.004
- 780 Yona, S., Kim, K. W., Wolf, Y., Mildner, A., Varol, D., Breker, M., . . . Jung, S. (2013). Fate mapping reveals  
781 origins and dynamics of monocytes and tissue macrophages under homeostasis. *Immunity*,  
782 38(1), 79-91. doi:10.1016/j.immuni.2012.12.001
- 783 Zhang, B., Kirov, S., & Snoddy, J. (2005). WebGestalt: an integrated system for exploring gene sets in  
784 various biological contexts. *Nucleic Acids Res*, 33(Web Server issue), W741-748.  
785 doi:10.1093/nar/gki475



786 Zhang, Y., Chen, K., Sloan, S. A., Bennett, M. L., Scholze, A. R., Keefe, S., . . . Wu, J. Q. (2014). An RNA-  
787 Sequencing Transcriptome and Splicing Database of Glia, Neurons, and Vascular Cells of the  
788 Cerebral Cortex. *The Journal of Neuroscience*, 34(36), 11929. doi:10.1523/JNEUROSCI.1860-  
789 14.2014

790 **Author contributions**

791 Sarah R. Ocañas: first author, design of the work, execution of experiments, data acquisition,  
792 analysis, and interpretation, figure generation, manuscript writing and preparation

793 Kevin Pham: execution of experiments, data acquisition, analysis, and interpretation, figure  
794 generation, manuscript writing and preparation

795 Harris Blankenship: execution of experiments, data acquisition, analysis, and interpretation,  
796 manuscript writing and preparation

797 Adeline Machalinski: execution of experiments, data acquisition, analysis, and interpretation

798 Ana J. Chucair-Elliott: design of the work, execution of experiments, data acquisition, analysis,  
799 and interpretation, figure generation, manuscript writing and preparation

800 Willard M. Freeman: Corresponding author, conceptual design of the study, data analysis and  
801 interpretation, figure generation, manuscript writing, preparation, and submission.

802 **Competing Interest statements**

803 Sarah R. Ocañas: None

804 Kevin Pham: None

805 Harris Blankenship: None

806 Adeline Machalinski: None

807 Ana J. Chucair-Elliott: None

808 Willard M. Freeman: None

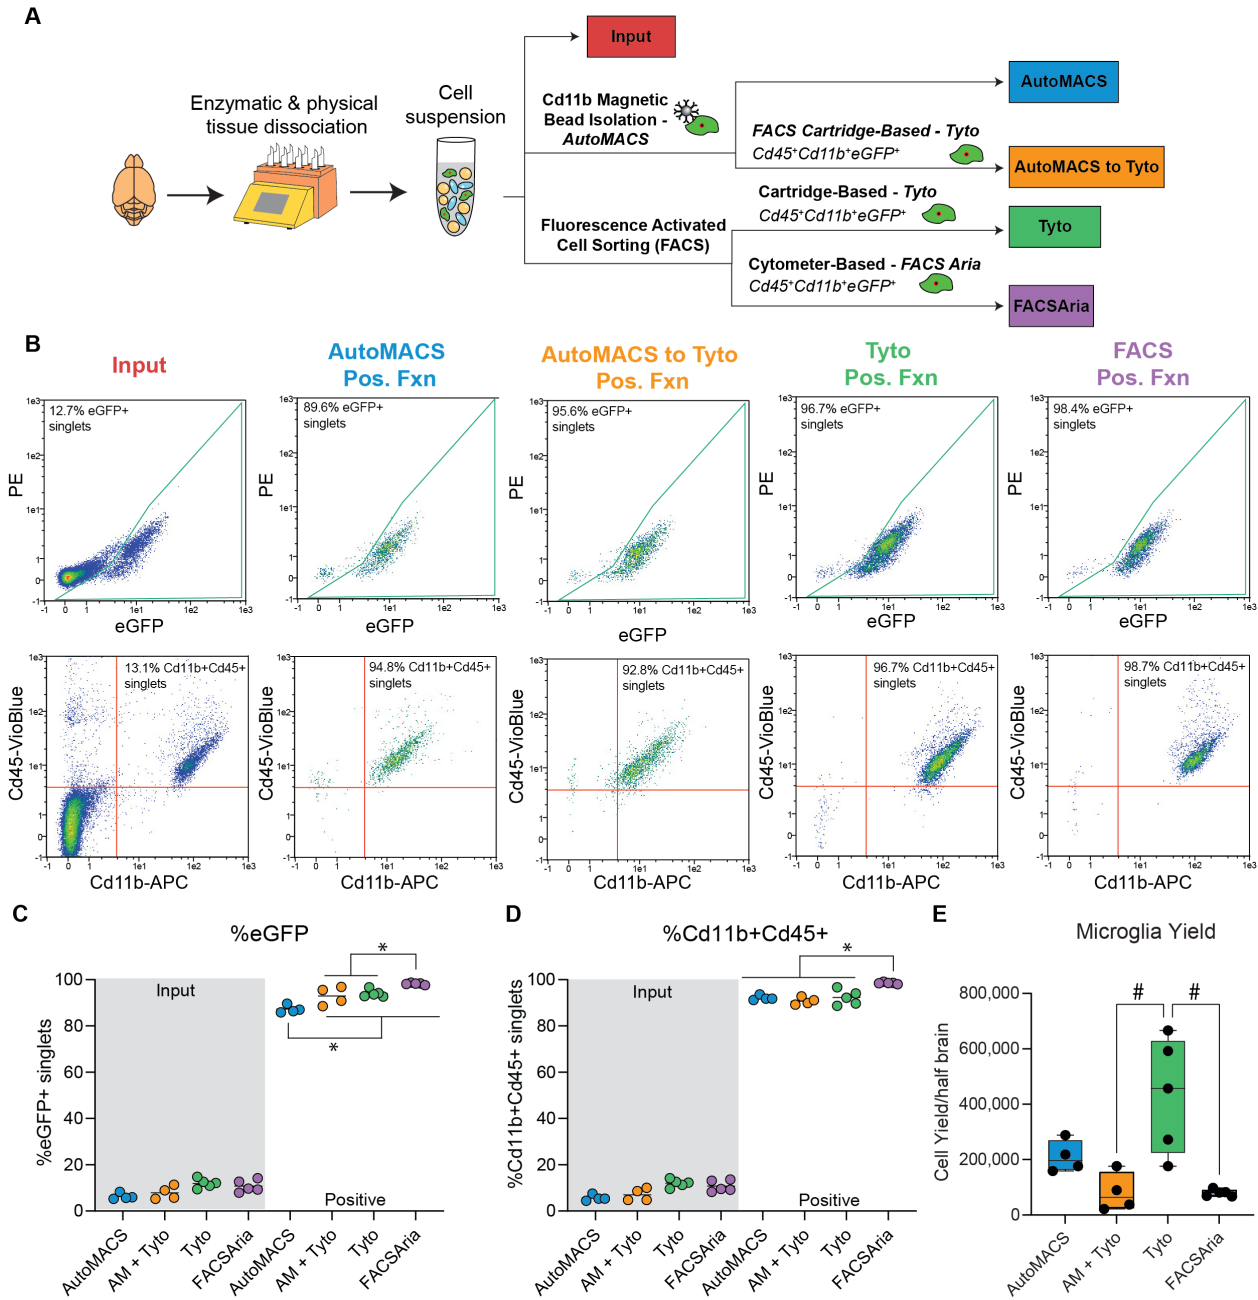

809

810 **Figure 1. Comparison of purity and yield among microglial cell isolation techniques.** A)  
 811 Schematic of the experimental design. Cx3cr1-NuTRAP brains were enzymatically and  
 812 mechanically dissociated to create a single cell suspension. Different microglial sorting techniques  
 813 were compared to cell input for purity, yield, and transcriptomic signatures. B) Representative flow  
 814 cytometry plots of immunostained single-cell suspensions from input and after each of the sorting  
 815 strategies shows a distinct population of: eGFP+ cells (identified as Cx3cr1+ microglia) and  
 816 Cd11b+Cd45+ cells (identified as microglia per traditional cell surface markers). All sort positive  
 817 fractions were enriched for: (C) eGFP+ singlets and (D) Cd11b+Cd45+ singlets in the positive  
 818 fractions (as compared to input). (Two-Way ANOVA, Main effect of TRAP Fraction,  $p < 0.001$ ).  
 819 When comparing positive fractions, the AutoMACS positive fraction had lower %eGFP+ singlets  
 820 as compared to all other sort methods. FACS Aria had higher percentage of eGFP+ singlets than

821 all other sort methods. FACS Aria had higher percentage of Cd11b+Cd45+ singlets as compared  
822 to all other sort methods positive fractions (Two-way ANOVA, Tukey's post-hoc, \* $p < 0.05$ ). E)  
823 Microglial yield was significantly higher in the MACSQuant Tyto positive fraction as compared to  
824 the AutoMACS to MACSQuant Tyto and FACS Aria positive fractions (One-Way ANOVA, Tukey's  
825 posthoc, # $p < 0.01$ ).

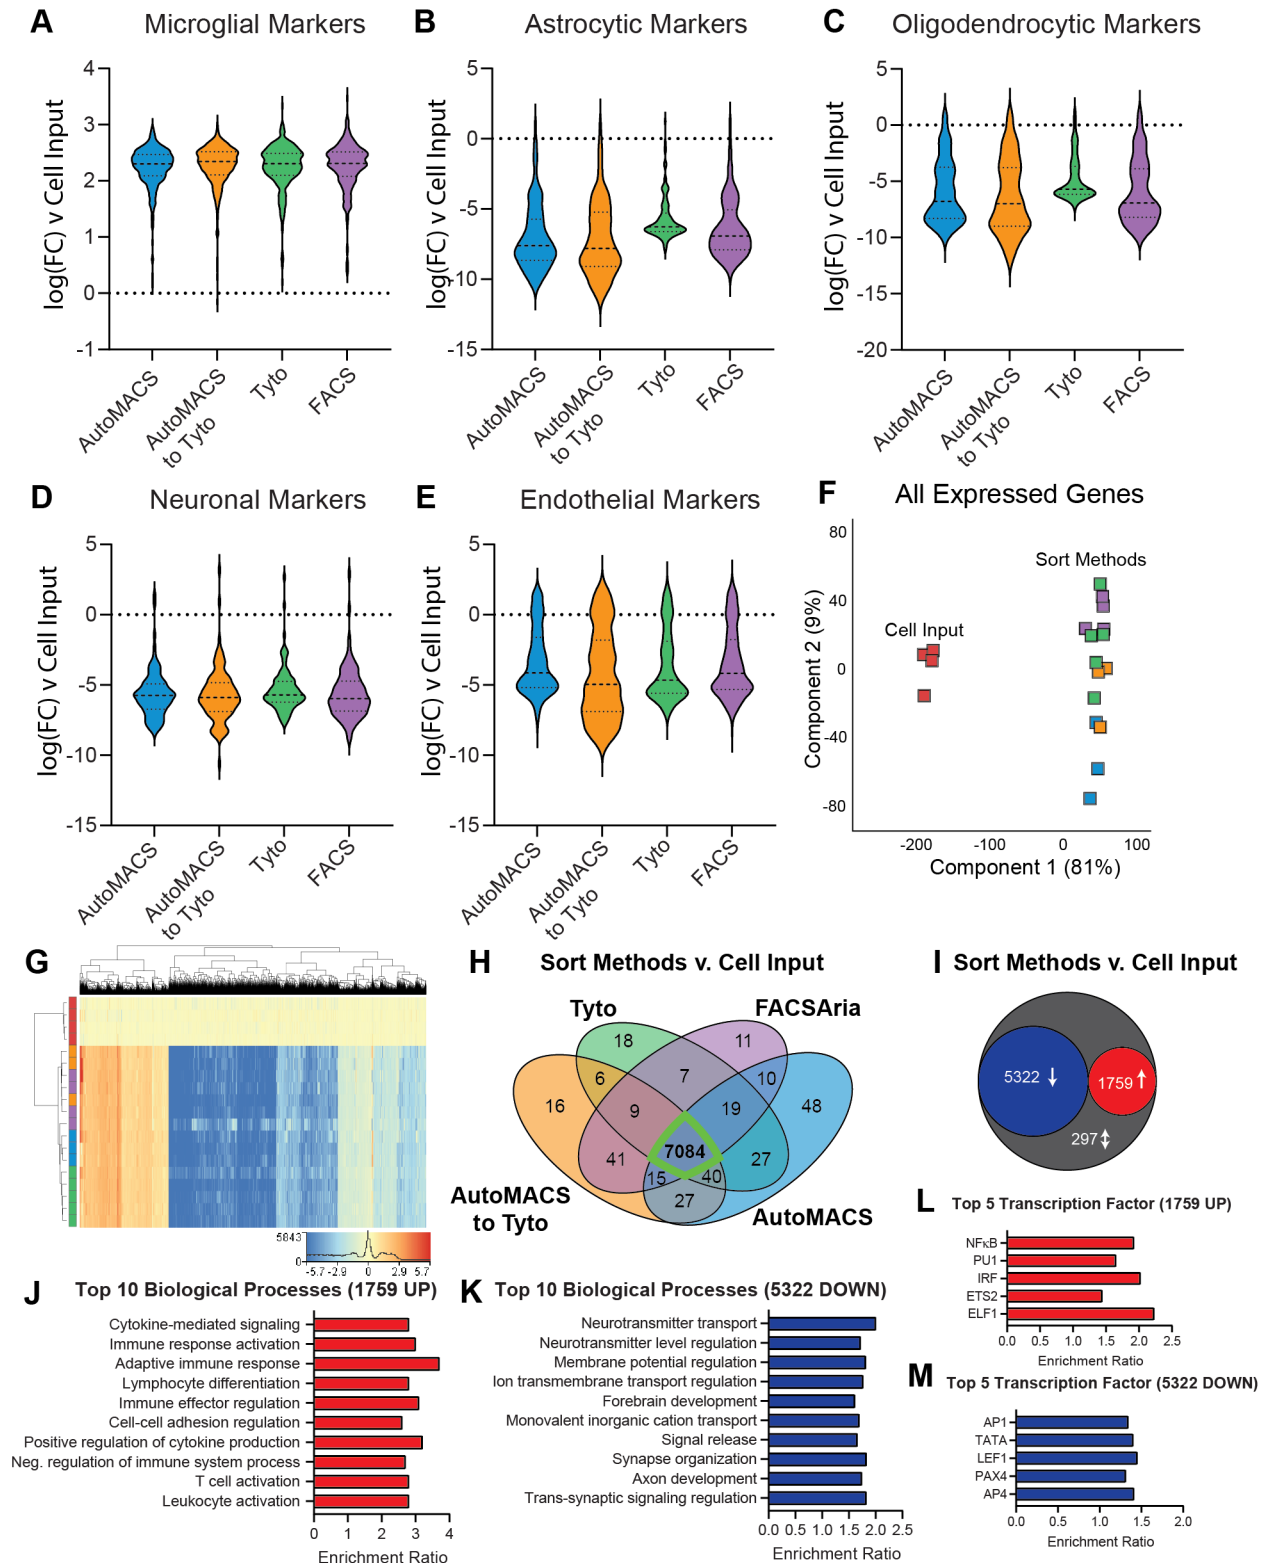

826

827 **Figure 2. Comparison of transcriptomic profiles of microglia isolated from various cell**  
 828 **sorting methods.** RNA-Seq libraries were made from each of the groups represented in Figure  
 829 1A to compare the transcriptomic profiles of microglia isolated via four different cell sorting

830 strategies. Each of the strategies had similar levels of (A) enrichment of microglial transcripts and  
831 depletion of: (B) astrocytic, (C) oligodendrocytic, (D) neuronal, and (E) endothelial transcripts  
832 when compared to cell input. F) Principal component analysis of all expressed genes shows clear  
833 separation of cell input from all other sort methods in the first component with 81% of explained  
834 variance. G) Hierarchical clustering of differentially expressed genes (DEGs) (One-Way ANOVA,  
835 BHMTTC, SNK FDR<0.1, |FC|>2) shows separation of cell input and sort methods. Each of the  
836 sort methods show very similar patterning of expression across DEGs. H) Comparison of SNK  
837 post-hocs from each of the sort methods v. cell input, showed the majority of  
838 enrichments/depletions (ie.,DEGs) (7084/7378 = 96%) were in common between all sort  
839 methods. I) There were 5322 DEGs (72%) that were depleted and 1759 DEGs (24%) that were  
840 enriched in all sort methods compared to cell input. There were only 297 discordant DEGs (4%)  
841 between the different sort methods as compared to cell input. J) Top 10 biological processes over-  
842 represented in the 1759 genes upregulated in all sort methods compared to cell input (Gene  
843 Ontology Over-Representation Analysis, BHMTTC FDR <0.05). K) Top 10 biological processes  
844 over-represented in the 5322 genes downregulated in all sort methods compared to cell input  
845 (Gene Ontology Over-Representation Analysis, BHMTTC FDR <0.05). L) Top 5 transcription factor  
846 targets over-represented in the 1759 genes upregulated in all sort methods compared to cell input  
847 (Transcription factor target network over-representation analysis, BHMTTC FDR<0.05). M) Top 5  
848 transcription factor targets over-represented in the 5322 genes downregulated in all sort methods  
849 compared to cell input (Transcription factor target network over-representation analysis, BHMTTC  
850 FDR<0.05).

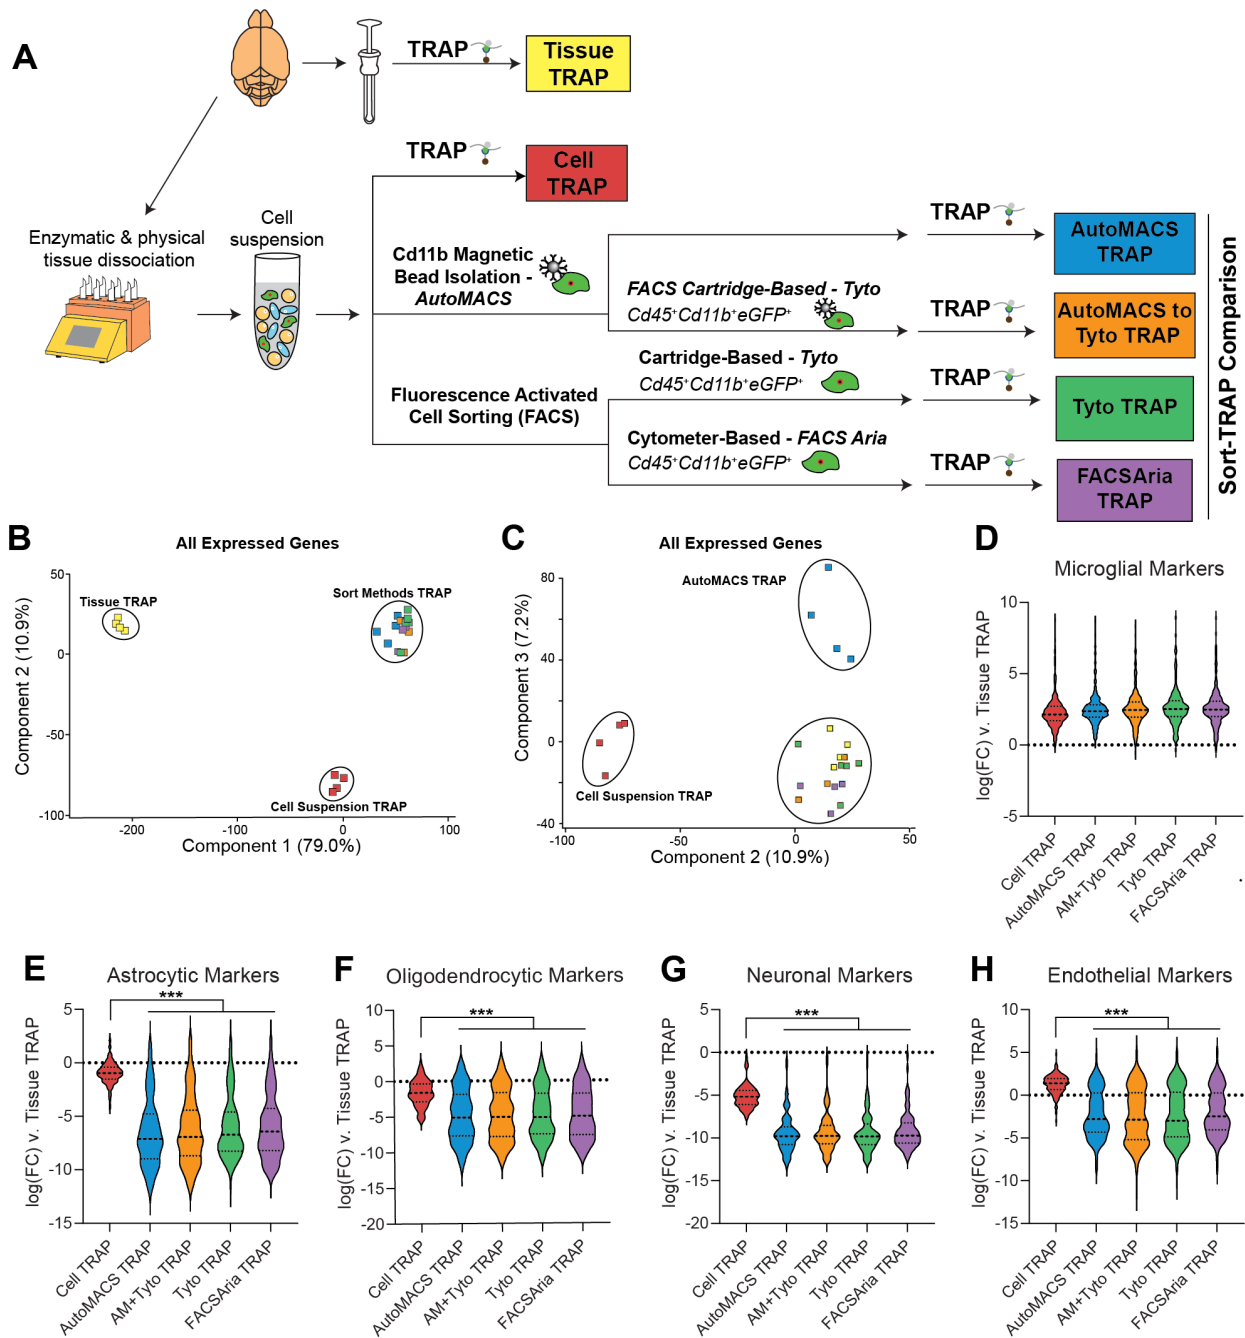

851

852 **Figure 3. Comparison of TRAP-isolated microglial transcriptome from tissue homogenate,**  
 853 **cell suspension, and various microglial cell sorting methods.** A) Schematic of the  
 854 experimental design. Cx3cr1-NuTRAP brains were hemisected and processed in halves for  
 855 whole-tissue homogenization or enzymatic and mechanical dissociation to create a single cell  
 856 suspension. Single cell suspensions were then sorted using MACS- and/or FACS-based isolation  
 857 of microglia. Tissue homogenate, mixed-cell suspension, and microglia sorted by each of the four  
 858 depicted methods were subjected to TRAP to isolate microglial-specific ribosomally-bound RNA  
 859 for creation of RNA-Seq libraries. B) PCA of all expressed genes (>5 read counts in all samples  
 860 from at least one group) separates Tissue TRAP from all other groups in the first component (79%  
 861 explained variance) and Cell Suspension TRAP from all other groups in the second component

862 (10.9% explained variance). C) Third component of PCA on all expressed genes separated  
863 AutoMACS TRAP from all other groups (7.2% explained variance). Each of the sort strategies  
864 had similar levels of (D) enrichment of microglial transcripts and depletion of: (E) astrocytic, (F)  
865 oligodendrocytic, (G) neuronal, and (G) endothelial transcripts when compared to Tissue TRAP.  
866 All of the sort methods showed stronger depletion of: (E) astrocytic, (F) oligodendrocytic, (G)  
867 neuronal, and (G) endothelial transcripts when compared to Cell TRAP (One-way ANOVA,  
868 Tukey's post-hoc, \*\*\* $p < 0.001$ ).



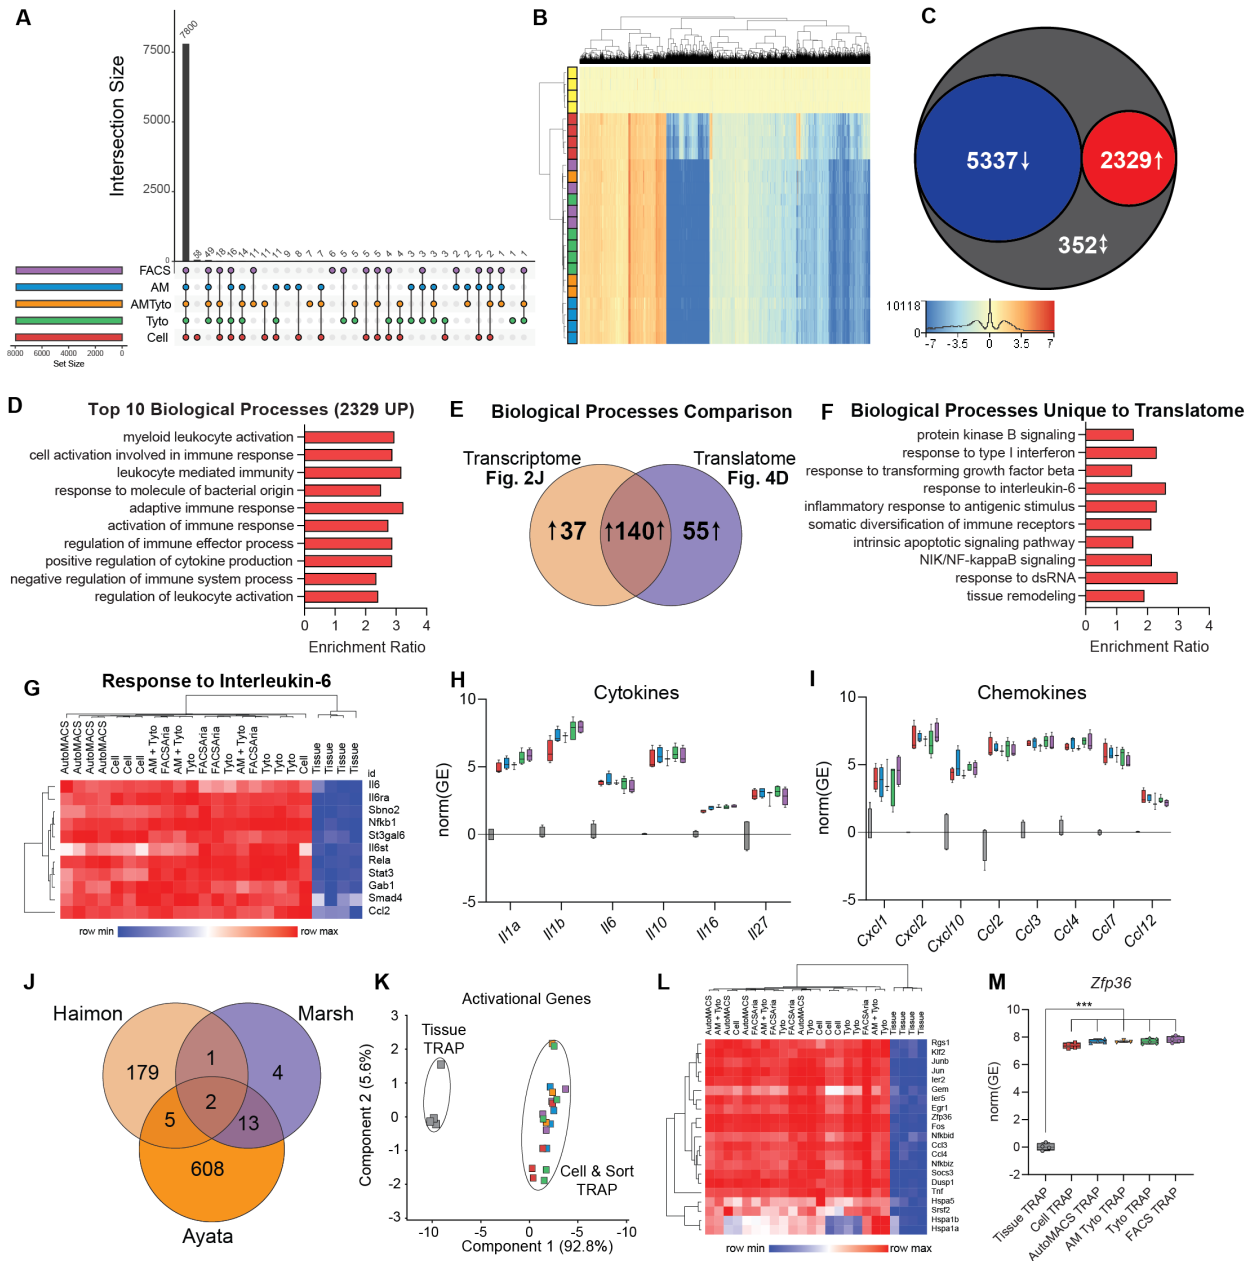

869

870 **Figure 4. Cell isolation and sorting techniques alter TRAP-isolated microglial transcriptome**  
 871 **compared to whole-tissue TRAP.** RNA-Seq libraries were made from each of the groups  
 872 represented in Figure 3A to compare the TRAP-isolated microglial transcriptomes between whole-  
 873 tissue-TRAP and each of the cell isolation and sorting methods. A) Upset plot of DEGs for all  
 874 groups v. Tissue TRAP (One-Way ANOVA, BHMT, SNK FDR<0.1, |FC|>2). B) Hierarchical  
 875 clustering of DEGs shows separation of tissue TRAP from all other groups. Cell TRAP also  
 876 clusters separately from all Sort-TRAP groups. C) Comparison of DEGs from each group (Cell-  
 877 and Sort-TRAP) v. Tissue-TRAP, revealed 5337 common DEGs (67%) that were depleted and  
 878 2329 common DEGs (29%) that were enriched in all groups (Cell- and Sort-TRAP) compared to  
 879 Tissue-TRAP. There were only 352 discordant DEGs (4%) between the different sort methods as  
 880 compared to cell input. D) Top 10 biological processes over-represented in the 2329 genes  
 881 upregulated in Cell TRAP and Sort-TRAP compared to Tissue TRAP (Gene Ontology Over-

882 Representation Analysis, Hypergeometric test, BHMTc FDR <0.05). E) Comparison of  
883 upregulated transcriptomic pathways (Figure 2J; Supplemental Table 3) and upregulated  
884 translome pathways (Figure 4D, Supplemental Table 5) reveal 55 biological processes that are  
885 upregulated in the translome only. F) Selection of 10 biological processes that are uniquely  
886 upregulated in the translome (from the 55 identified in Figure 4E). G) Heatmap of genes involved  
887 in "Response to Interleukin-6 (GO:0070741)" biological process. H) Cytokines (*Il1a*, *Il1b*, *Il6*, *Il10*,  
888 *Il16*, *Il27*) that are upregulated in the Cell- and Sort-TRAP groups compared to Tissue-TRAP  
889 (One-Way ANOVA, BHMTc, SNK FDR<0.1, |FC|>2). I) Chemokines (*Cxcl1*, *Cxcl2*, *Cxcl10*, *Ccl2*,  
890 *Ccl3*, *Ccl4*, *Ccl7*, *Ccl12*) that are upregulated in the Cell- and Sort-TRAP groups compared to  
891 Tissue-TRAP (One-Way ANOVA, BHMTc, SNK FDR<0.1, |FC|>2). J) Intersection of activational  
892 genes identified in three previous studies (Ayata et al., 2018; Haimon et al., 2018; Marsh et al.,  
893 2020) identified 21 *ex vivo* activational transcripts represented in at least two of the studies. I)  
894 PCA of 21 *ex vivo* activational genes shows clear separation of tissue TRAP from all other groups  
895 in the first component (92.8% explained variance). J) Heatmap of 21 activational genes shows  
896 high levels of *ex vivo* activational transcripts across Cell- and Sort-TRAP methods compared to  
897 Tissue-TRAP. K) *Zfp36* is enriched in Cell TRAP and Sort-TRAP compared to Tissue TRAP (One-  
898 Way ANOVA, Tukey's posthoc, \*\*\*p<0.001).

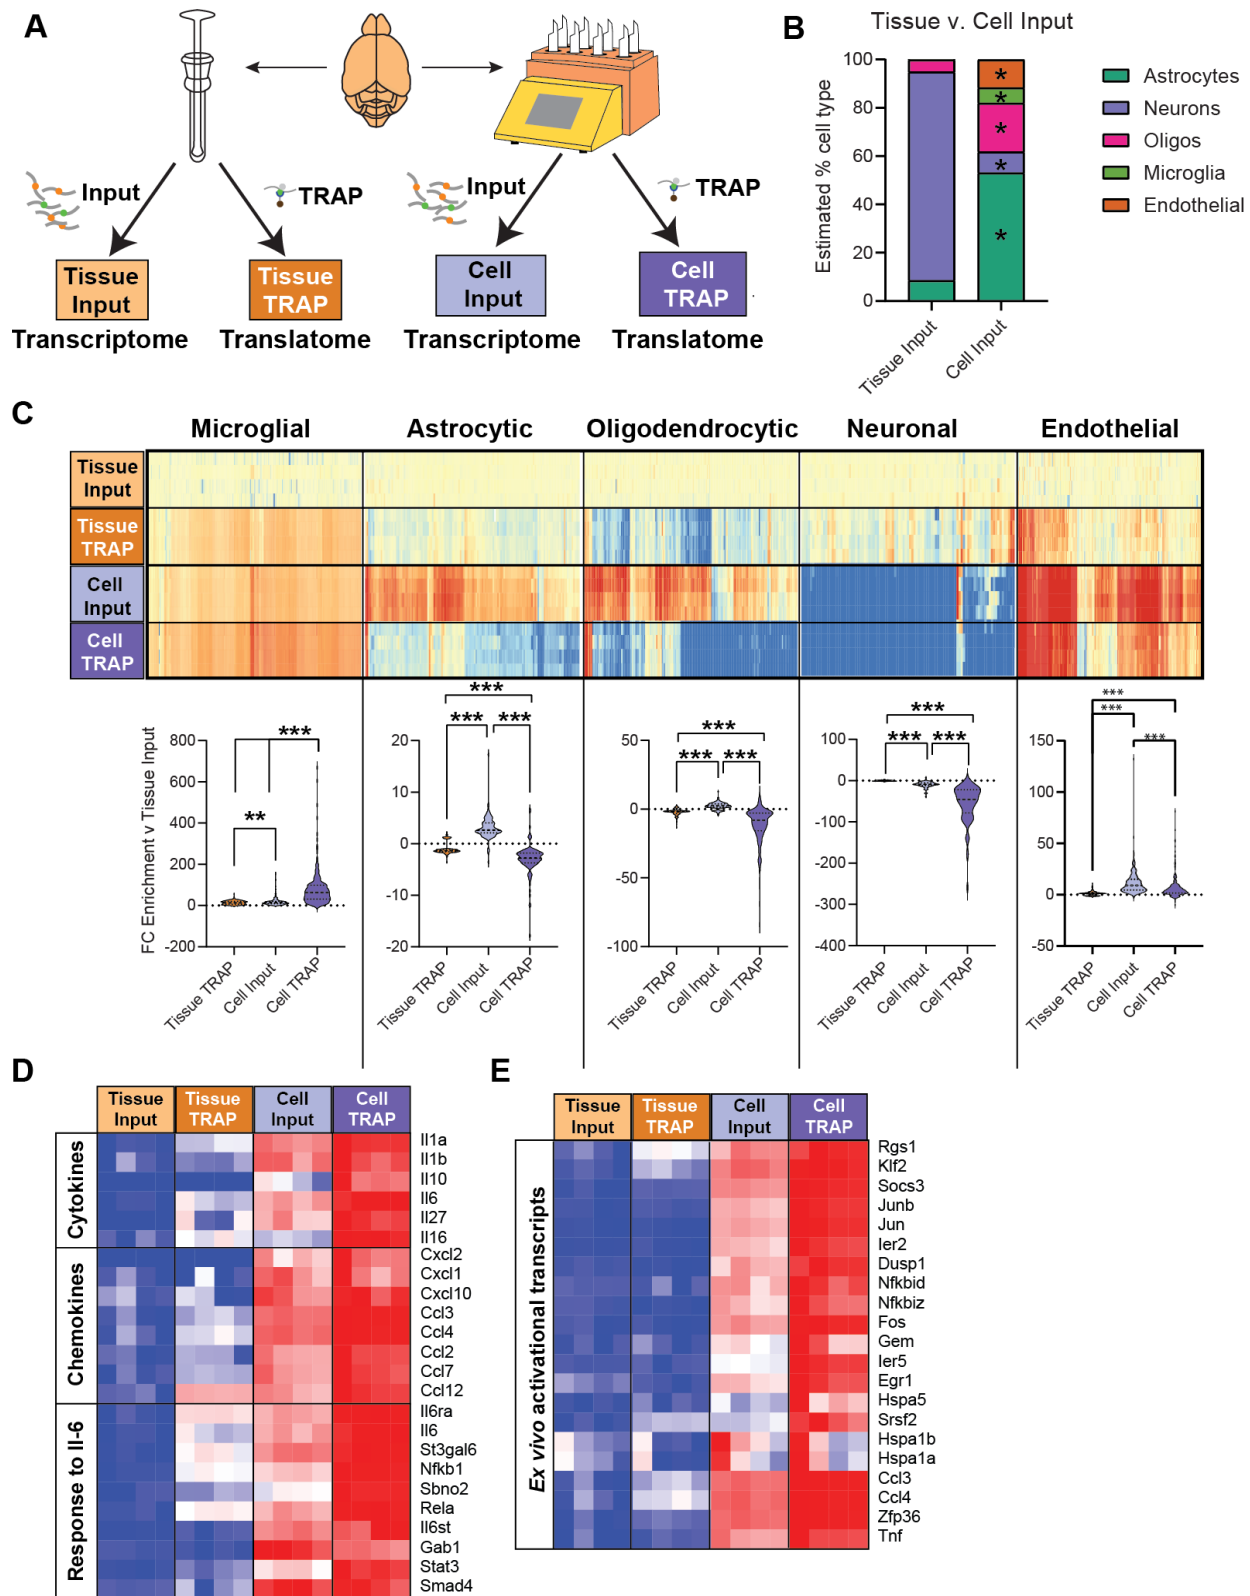

903 cell type-specific markers for microglia, astrocytes, oligodendrocytes, neurons, and endothelial  
904 cells (One-way ANOVA, Tukey's post-hoc, \* $p < 0.05$ , \*\* $p < 0.01$ , \*\*\* $p < 0.001$ ). D) Heatmap of  
905 inflammatory cytokines, chemokines, and response to Il-6 pathway genes. E) Heatmap of *ex vivo*  
906 activational genes identified in at least two previous studies (Ayata et al., 2018; Haimon et al.,  
907 2018; Marsh et al., 2020).

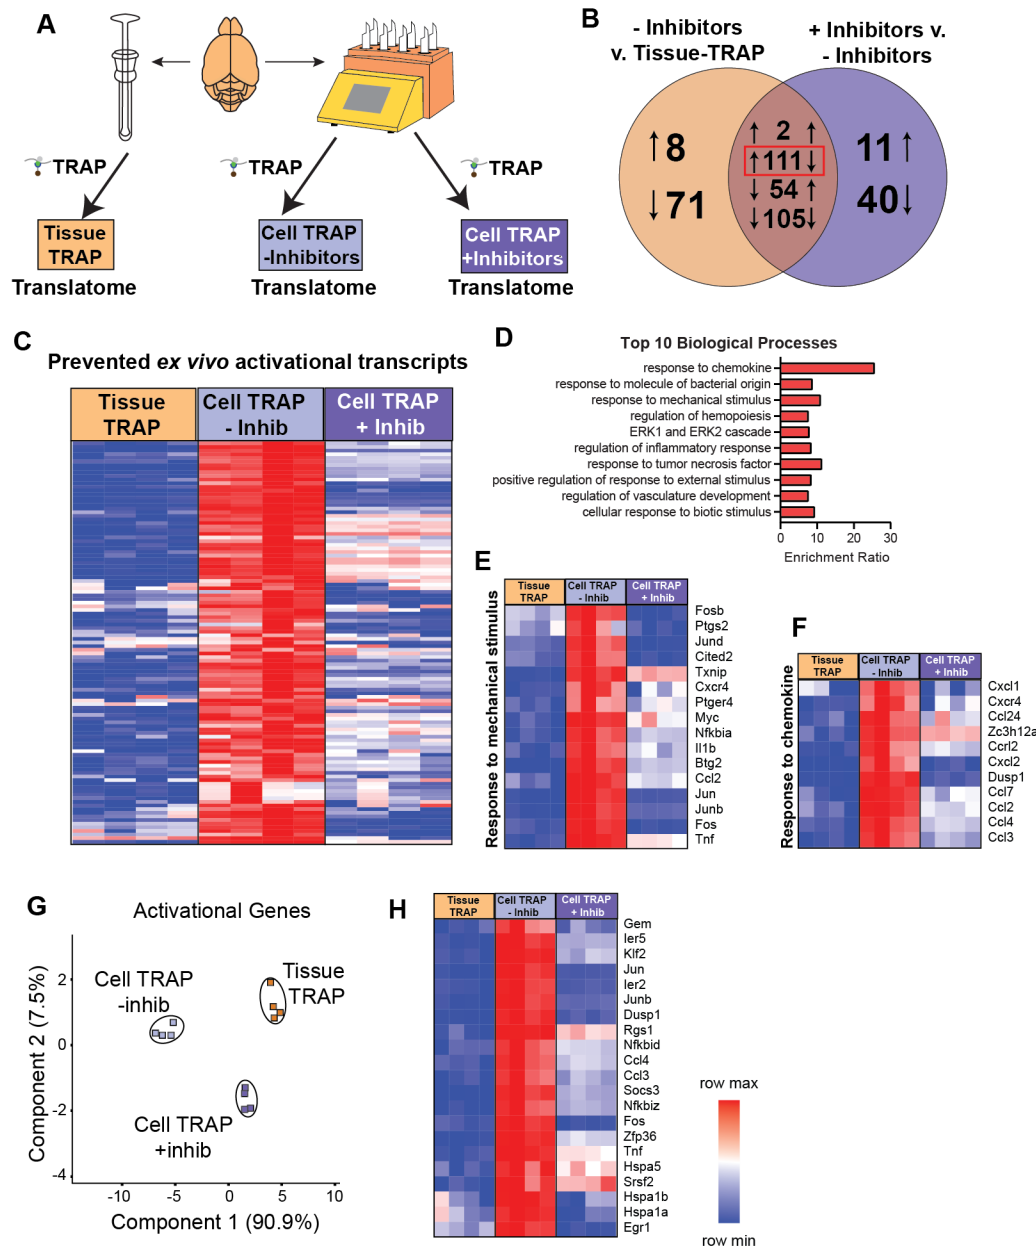

908

909 **Figure 6. *Ex vivo* activational profiles with transcriptional and translational inhibitors.** A) 910 Schematic of experimental design presented in this figure. B) Differentially expressed genes were 911 called between Cell-TRAP (+/- Inhibitors) and Tissue-TRAP. A subset of 111 genes were 912 activated with cell preparation (Up in Cell-TRAP -Inhibitors v Tissue-TRAP) were decreased with 913 the addition of inhibitors (Down in Cell-TRAP + Inhibitors v. Cell-TRAP – Inhibitors) (One-Way 914 ANOVA, BHMTTC, SNK FDR<0.1, |FC|>2). These 111 genes were classified as *ex vivo* 915 activational transcripts prevented by the addition of inhibitors. C) Heatmap of the 111 *ex vivo* 916 activational genes prevented by the addition of inhibitors. D) Top 10 biological processes over- 917 representation in the 111 *ex vivo* activational genes prevented by the addition of inhibitors 918 (hypergeometric test, BHMTTC, FDR<0.05). E) Heatmap of response to mechanical stimulus 919 biological process pathway. F) Heatmap of response to cytokine biological process pathway. G)

920 PCA of 21 *ex vivo* activational genes identified in at least two previous studies (Ayata et al., 2018;  
921 Haimon et al., 2018; Marsh et al., 2020)

922

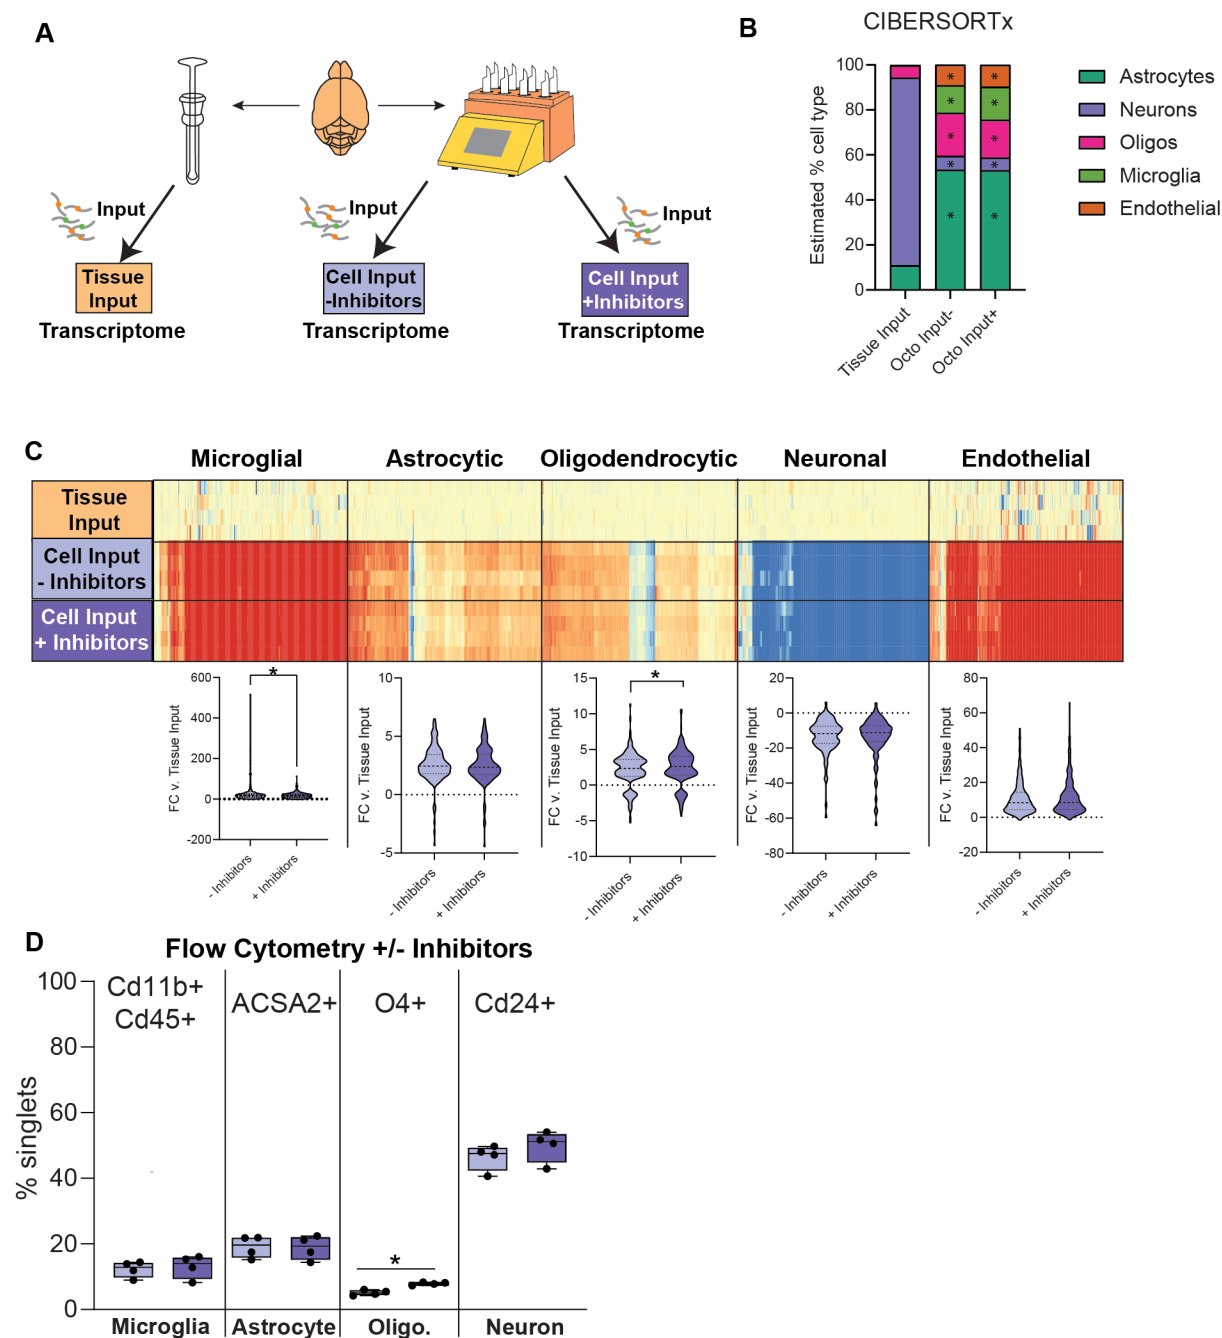

923

924 **Figure 7. Effect of transcriptional and translational inhibitors on cell abundance.** A)  
 925 Schematic of experimental design presented in this figure. B) CIBERSORTx cellularity estimates  
 926 based on whole-transcriptome RNA-Seq from Tissue Input and Cell Input (with and without  
 927 inhibitors). There were significant differences in the proportions of each cell type between Cell  
 928 Input +/-Inhibitors and Tissue Input (One-way ANOVA, Tukey's post hoc, \* $p < 0.05$ ). However,  
 929 there were no significant differences in relative cell abundances between Cell Inputs with the  
 930 addition of transcriptional and translational inhibitors. C) Heatmap and violin plots of cell type-  
 931 specific markers for microglia, astrocytes, oligodendrocytes, neurons, and endothelial cells  
 932 (Paired t-test, Bonferonni correction, \* $p < \alpha = 0.01$ ). D) Flow cytometry on cell type-specific markers  
 933 for microglia (Cd11b+Cd45+), astrocytes (ACSA2+), and neurons (Cd24+) shows no significant

934 differences in cell abundances with the addition of transcriptional and translational inhibitors. Flow  
935 cytometry on cell type-specific markers for oligodendrocytes (O4+) shows a small, but significant,  
936 increase in oligodendrocytes with the addition of transcriptional and translational inhibitors (Paired  
937 t-test, Bonferonni correction,  $*p < \alpha = 0.01$ ).



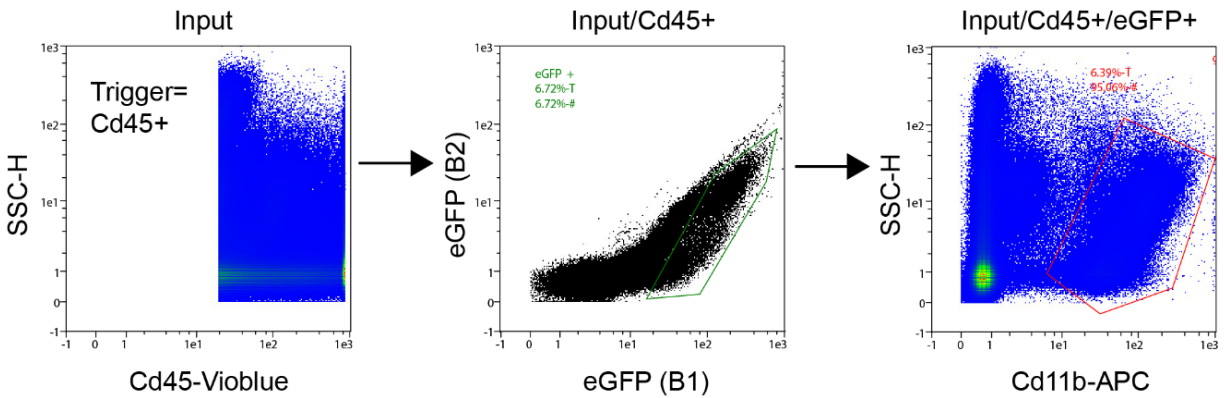

938

939 **Figure S1.** Cardette-based FACS gating strategy for microglial sorting on Miltenyi Biotec  
940 MACSQuant Tyto.

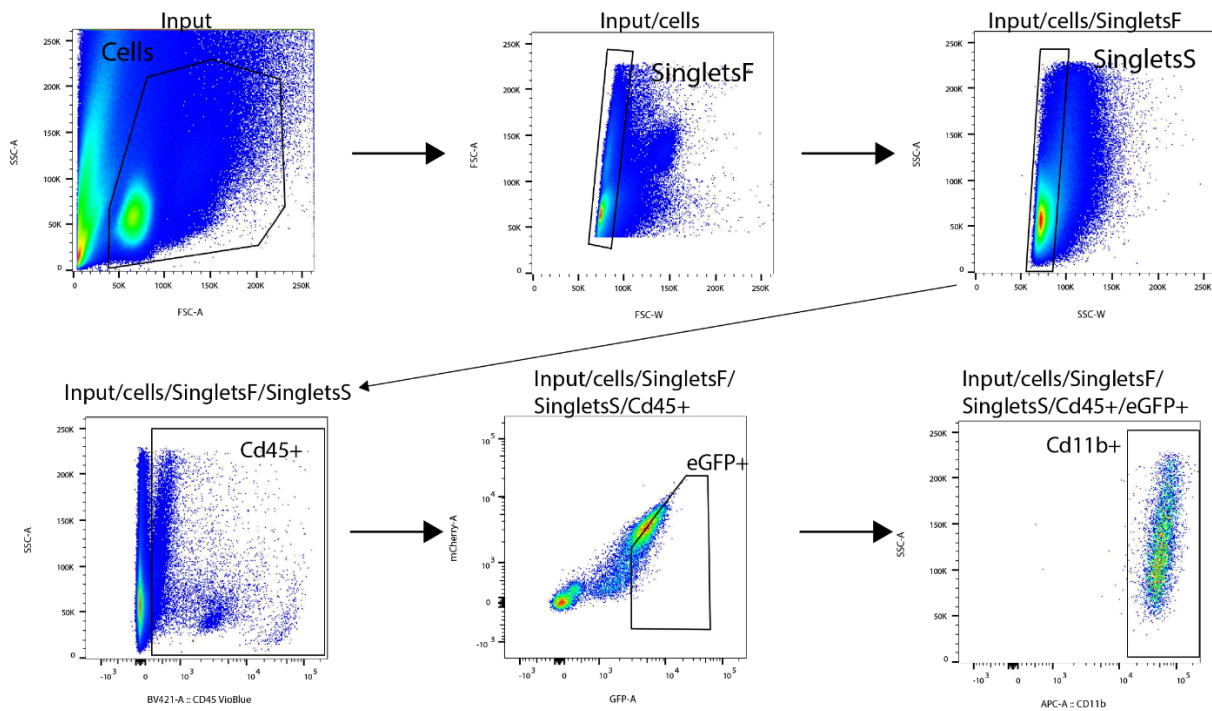

941

942 **Figure S2.** Cytometer-based FACS gating strategy for microglial sorting on FACSaria.

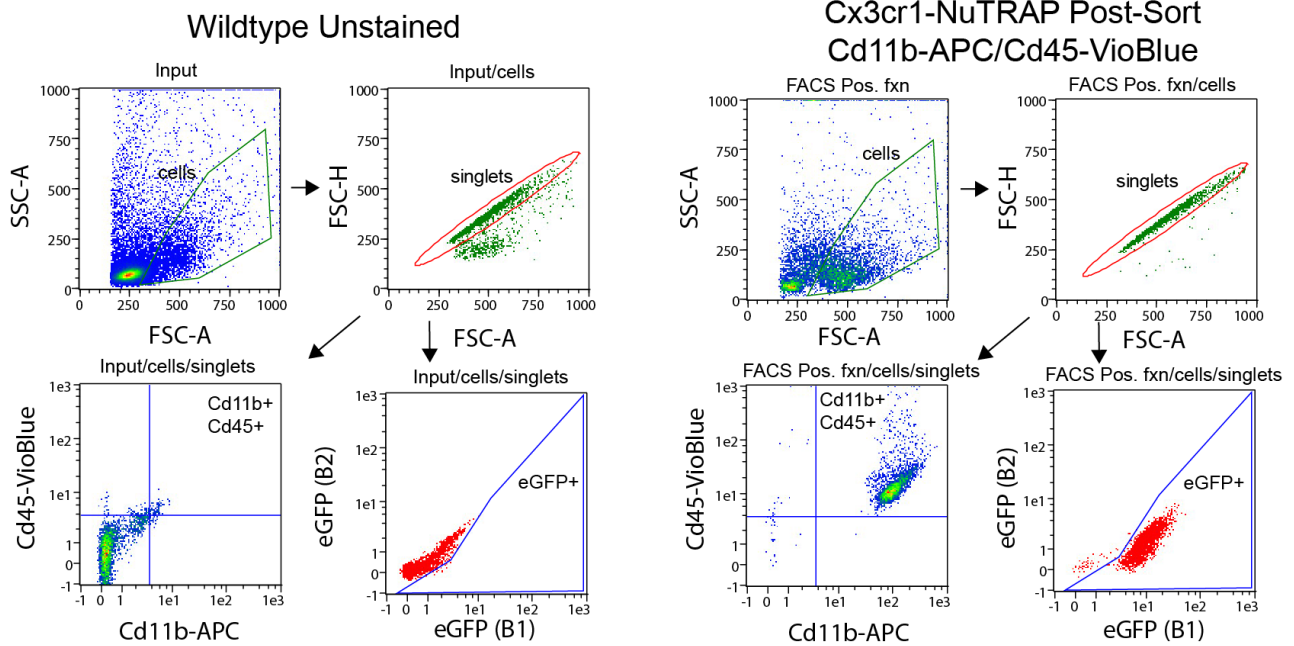

**Figure S3.** Gating strategy for assessment of microglial purity by different sort methods.

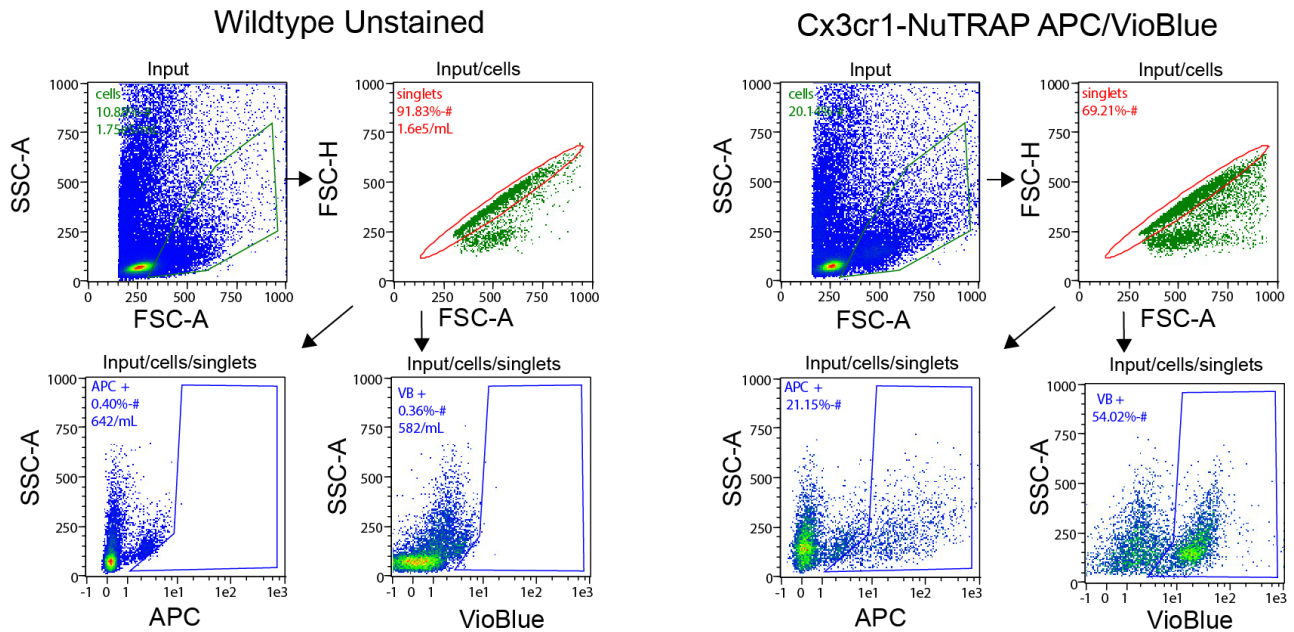

**Figure S4.** Gating strategy for assessment of cellularity.

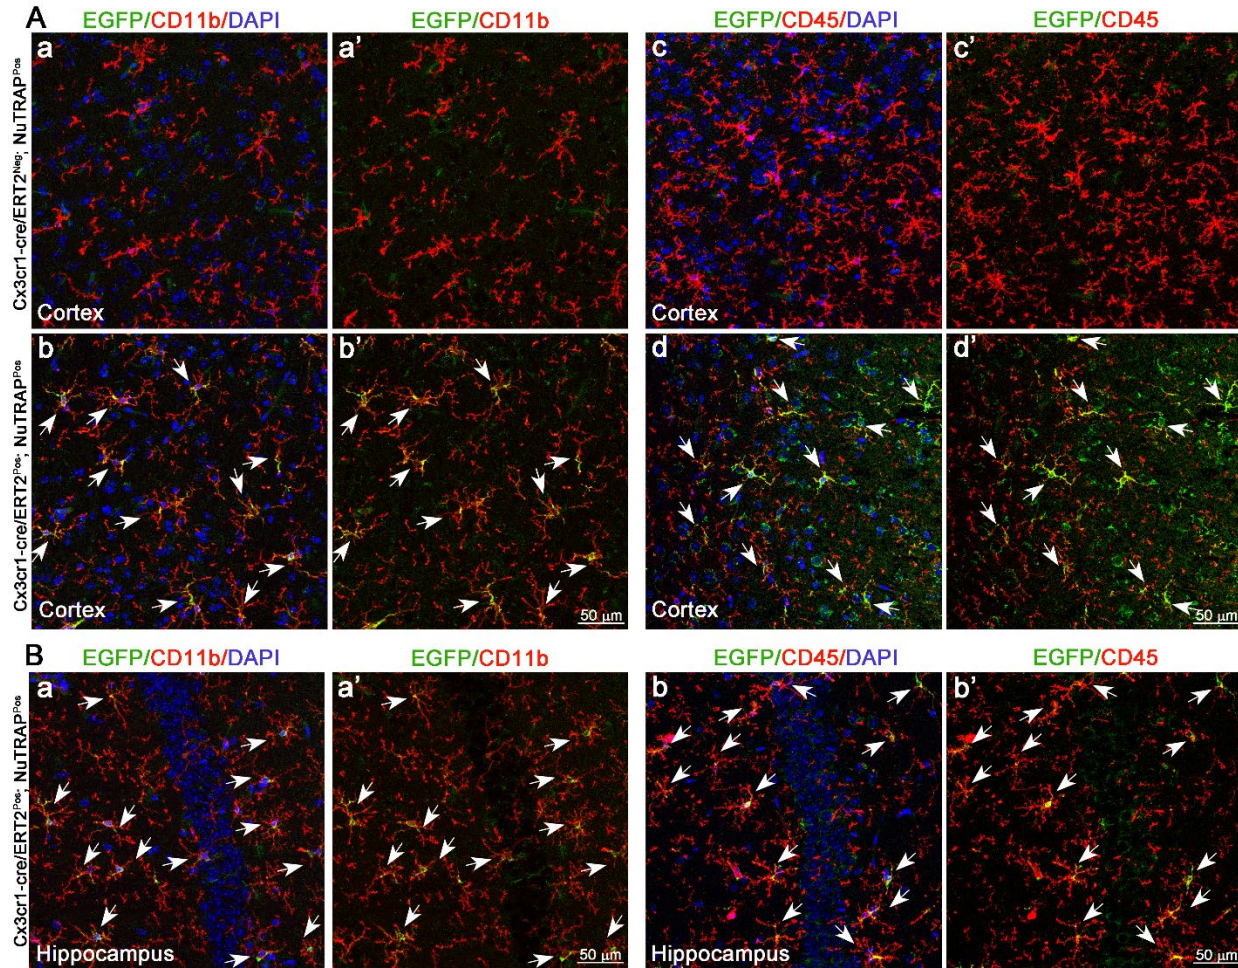

947

948 **Figure S5. Validation of microglial identity of recombined cells in the Cx3cr1-NuTRAP**  
949 **brain.** Two months after Tam treatment, brains were harvested from Cx3cr1-NuTRAP and cre  
950 negative NuTRAP<sup>+</sup> (control) mice for immunohistochemistry (IHC). **A.** Representative confocal  
951 fluorescent microscopy images of sagittal brain sections captured in the cortex show EGFP  
952 expression (green signal) in cells that co-expressed CD11b (red signal, **a-a'-b-b'**) and CD45 (red  
953 signal, **c-c'-d-d'**) in Cx3cr1-NuTRAP brains but not in the cre negative counterparts (n=2/group).  
954 **B.** Representative confocal fluorescent microscopy images captured in the hippocampus show  
955 EGFP expression (green signal) in cells that co-expressed CD11b (**a-a'**) and CD45 (**b-b'**) in  
956 Cx3cr1-NuTRAP brains DAPI: nuclear counterstain. Scale bar: 50 μm
