# Supplementary material for: Minimizing the ex vivo confounds of cell-isolation techniques on transcriptomic -profiles of purified microglia
Source: bioRxiv or medRxiv preprint supplement (doi:10.1101/2021.07.15.452509), 2021-07-15
Supplement: Supplementary file [file media-1.pdf]

**Supplemental Figures: Minimizing the *ex vivo* confounds of cell-isolation techniques on transcriptomic profiles of purified microglia**

**Authors:** Sarah R. Ocañas<sup>1,2</sup>, Kevin D. Pham<sup>1</sup>, Harris E. Blankenship<sup>1,2</sup>, Adeline H. Machalinski<sup>1</sup>, Ana J. Chucair-Elliott<sup>1</sup>, Willard M. Freeman<sup>1,3,4\*</sup>

**Affiliations:** <sup>1</sup>Genes & Human Disease Program, Oklahoma Medical Research Foundation, Oklahoma City, OK USA, <sup>2</sup>Department of Physiology, University of Oklahoma Health Sciences Center, Oklahoma City, OK USA, <sup>3</sup>Oklahoma City Veterans Affairs Medical Center, Oklahoma City, OK USA, <sup>4</sup>Department of Biochemistry and Molecular Biology, University of Oklahoma Health Sciences Center, Oklahoma City, OK USA

**To whom correspondence should be addressed:** \*Willard M. Freeman, Genes & Human Disease Program, Oklahoma Medical Research Foundation, 825 NE 13<sup>th</sup> Street, Oklahoma City, OK 73104, USA.

**Tel:** 405-271-3139

**Fax:** 405-271-2536

**E-mail address:** [bill-freeman@omrf.org](mailto:bill-freeman@omrf.org)

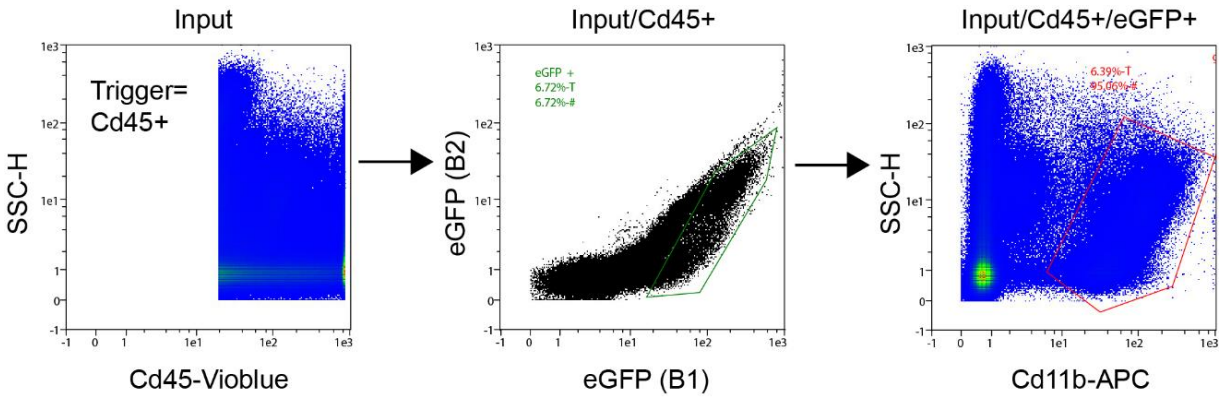

**Figure S1.** Cardette-based FACS gating strategy for microglial sorting on Miltenyi Biotec MACSQuant Tyto.

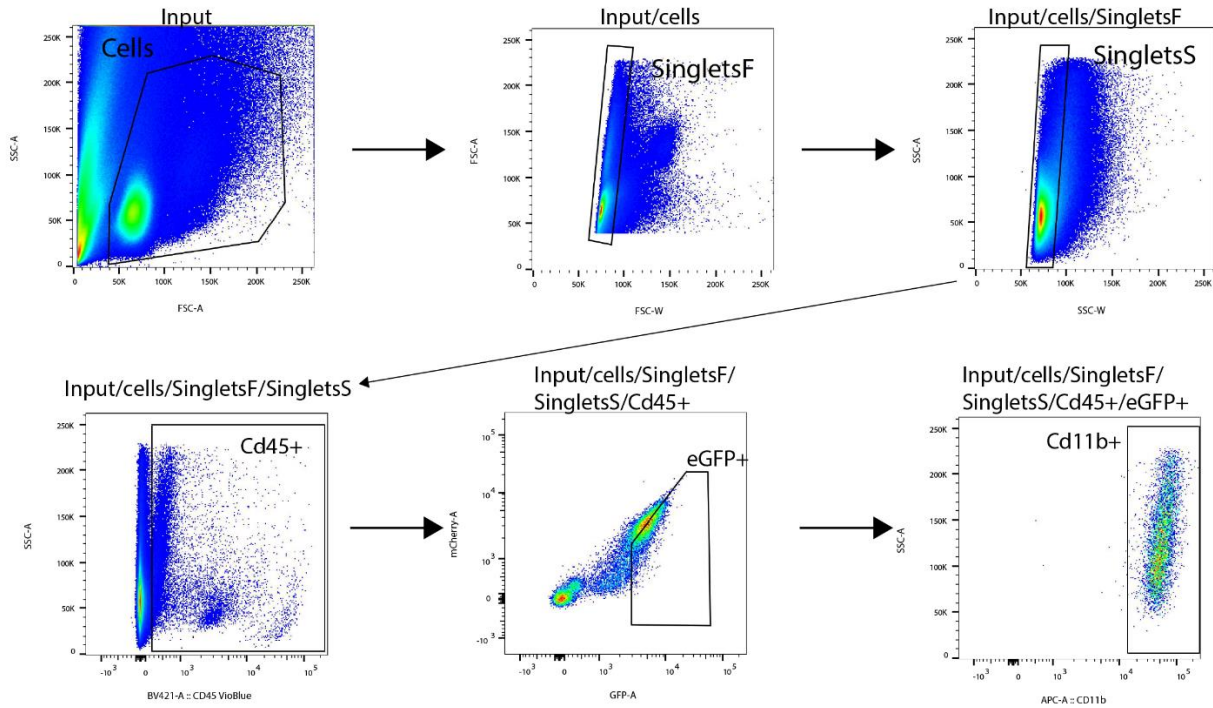

**Figure S2.** Cytometer-based FACS gating strategy for microglial sorting on FACSria.

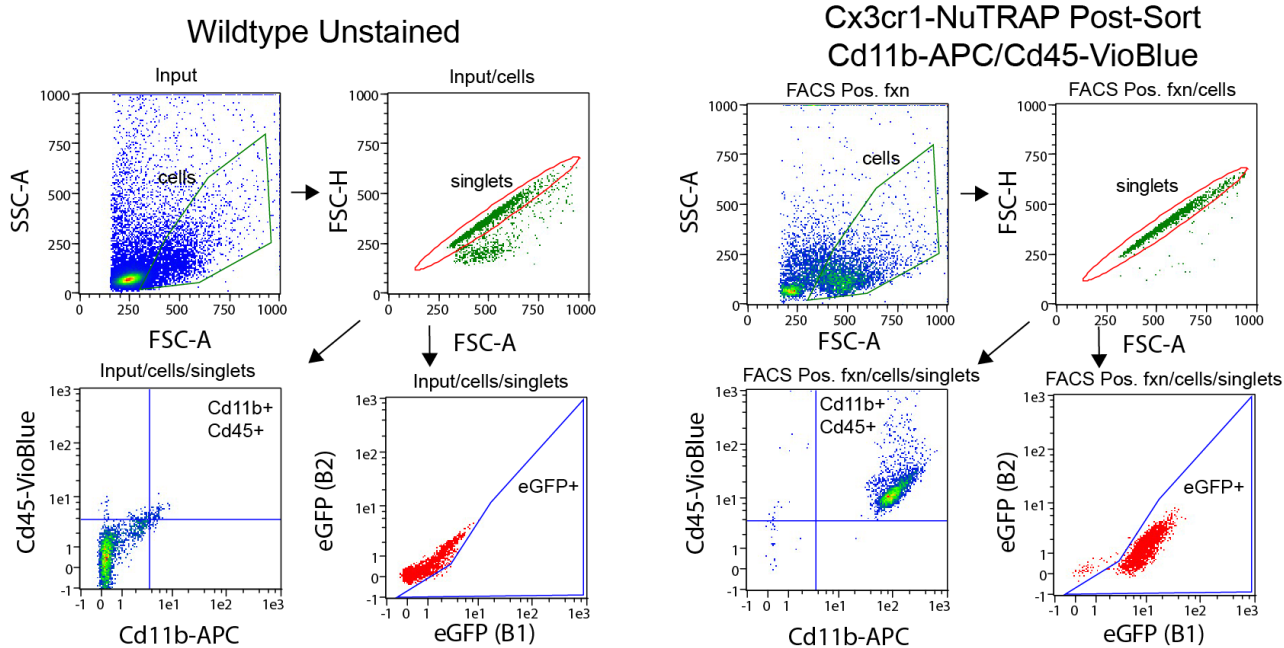

**Figure S3.** Gating strategy for assessment of microglial purity by different sort methods.

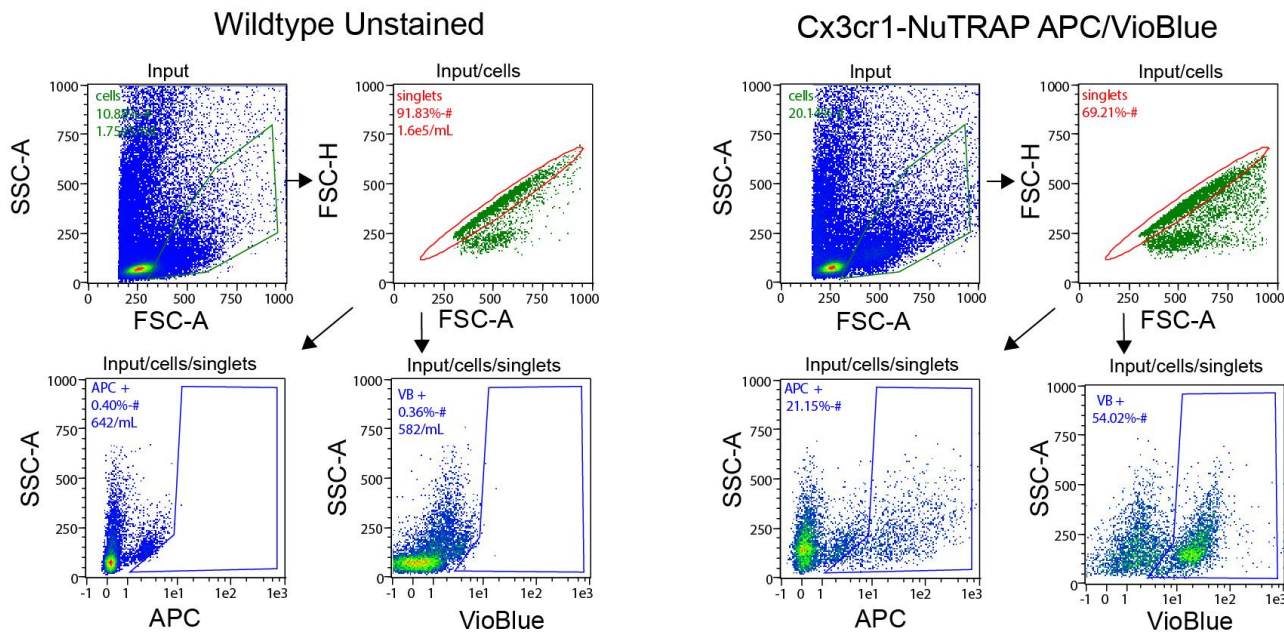

**Figure S4.** Gating strategy for assessment of cellularity.



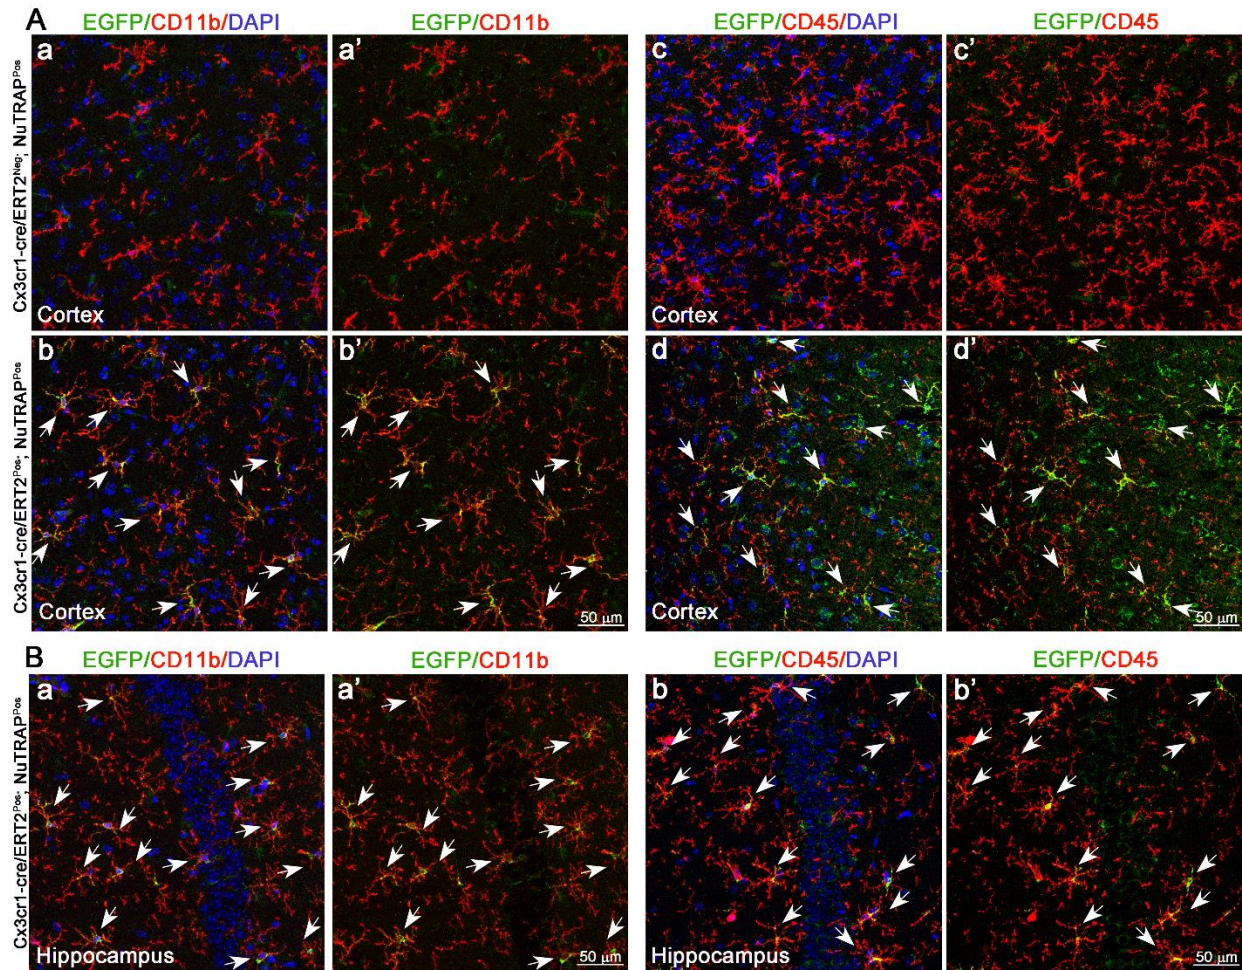

**Figure S5. Validation of microglial identity of recombined cells in the Cx3cr1-NuTRAP brain.** Two months after Tam treatment, brains were harvested from Cx3cr1-NuTRAP and cre negative NuTRAP<sup>+</sup> (control) mice for immunohistochemistry (IHC). **A.** Representative confocal fluorescent microscopy images of sagittal brain sections captured in the cortex show EGFP expression (green signal) in cells that co-expressed CD11b (red signal, **a-a'-b-b'**) and CD45 (red signal, **c-c'-d-d'**) in Cx3cr1-NuTRAP brains but not in the cre negative counterparts (n=2/group). **B.** Representative confocal fluorescent microscopy images captured in the hippocampus show EGFP expression (green signal) in cells that co-expressed CD11b (**a-a'**) and CD45 (**b-b'**) in Cx3cr1-NuTRAP brains DAPI: nuclear counterstain. Scale bar: 50  $\mu$ m
